# Supplementary material for: A calcineurin-mediated scaling mechanism that controls a K+-leak channel to regulate morphogen and growth factor transcription
Source: eLife. 2021 Apr 8;10:e60691. doi: 10.7554/eLife.60691 (PMC8110307; doi:10.7554/eLife.60691)
Supplement: Figure 3—source data 1. [file elife-60691-fig3-data1.xlsx]

## Sheet: Sheet1
first transplantation Experiment					Second Transplantation Experiment					third Transplantation experiment					Fourth Transplantation Experiment		Positive
	cell type	kcnk5b-GFP +	mCherry + and kcnk5b-GFP +			cell type	kcnk5b-GFP +	mCherry + and kcnk5b-GFP +			cell type	kcnk5b-GFP +	mCherry + and kcnk5b-GFP +			cell type	mCherry +	kcnk5b-GFP +	mCherry + and kcnk5b-GFP +
Fish 1	neurons - PNS	21	21		Fish 1: confocal section 1	mandibular cartilage	27	27		Fish 1: confocal section 1	epithelial - skin	13	13		Fish 1: confocal section 1	neural epithelium neural tube	18	18	18
						neuron	4	4			muscle - trunk	0	0			fibroblast	1	1	1
					Fish 1: confocal section 2	fibroblast	7	7		Fish 2: confocal section 1	epithelial - skin	18	18		Fish 2: confocal section 1	muscle	3	3	3
						mandibular cartilage	19	19			muscle - trunk	0	0		Fish 3: confocal section 1	neural epithelium-neural tube	2	2	2
						neuron	5	5		Fish 3: confocal section 1	neuron - PNS	1	1		Fish 4: confocal section 1	neurons	13	13	13
					Fish 1: confocal section 3	mandibular cartilage	12	12		Fish 3: confocal section 2	fibroblast	1	1		Fish 5: confocal section 1	neural epithelium-brain	4	4	4
						fibroblast	6	6		Fish 3: confocal section 3	fibroblast	5	5		Fish 6: confocal section 1	neural epithelium-brain	9	9	9
						neuron	4	4		Fish 3: confocal section 4	fibroblast	1	1		Fish 7: confocal section 1	otic vesicle cells	6	6	6
					Fish 1: confocal section 4	Epithelial cell - skin	3	3		Fish 3: confocal section 5	fibroblast	8	8		Fish 8: confocal section 1	neural tube cells	40	40	40
						fibroblast	7	7		Fish 3: confocal section 6	fibroblast	5	5		Fish 9: confocal section 1	neural tube cells	9	9	9
						neuron	5	5		Fish 3: confocal section 7	fibroblast	4	4			epithelial cells	5	5	5
					Fish 1: confocal section 5	Epithelial cell - skin	8	8		Fish 3: confocal section 8	fibroblast	3	3
						fibroblast	1	1		Fish 3: confocal section 9	neuron - PNS	1	1
						neuron	2	2		Fish 3: confocal section 10	neuron - PNS	1	1
					Fish 1: confocal section 6	Epithelial cell - skin	5	5		Fish 3: confocal section 11	neuron - PNS	1	1
						neuron - PNS	1	1			fibroblast	1	1
					Fish 1: confocal section 7	Epithelial cell - skin	3	3		Fish 3: confocal section 12	fibroblast	1	1
						neuron	1	1			fibroblast	2	2
						fibroblast	3	3		Fish 4: confocal section 1	fibroblast	1	1
					Fish 1: confocal section 8	fibroblast	6	6		Fish 4: confocal section 2	neuron - PNS	1	1
						Epithelial cell - skin	3	3		Fish 4: confocal section 4	fibroblast	1	1
						neuron	1	1			neuron - PNS	2	2
					Fish 1: confocal section 9	fibroblast	3	3		Fish 4: confocal section 5	neuron - PNS	3	3
						neuron	7	7		Fish 4: confocal section 6	neuron - PNS	1	1
						Epithelial cell - skin	7	7		Fish 4: confocal section 7	neuron - PNS	6	6
					Fish 1: confocal section 10	fibroblast	1	1		Fish 4: confocal section 8	neuron - PNS	1	1
						neuron	3	3		Fish 4: confocal section 9	fibroblast	1	1
						Epithelial cell - skin	6	6			neuron - PNS	1	1
					Fish 1: confocal section 11	Epithelial cell - skin	6	6		Fish 4: confocal section 10	fibroblast	1	1
					Fish 1: confocal section 12	Epithelial cell - skin	5	5			trunk muscle	44	44
					Fish 1: confocal section 13	Epithelial cell - skin	5	5
						fibroblast	4	4
						neuron	2	2
					Fish 1: confocal section 14	Epithelial cell - skin	4	4
						neuron	2	2
					Fish 1: confocal section 15	neuron	4	4
						Epithelial cell - skin	11	11
					Fish 1: confocal section 16	Epithelial cell - skin	20	20
						neuron	2	2
					Fish 1: confocal section 17	neuron	1	1
						Epithelial cell - skin	14	14
					Fish 1: confocal section 18	neuron	3	3
						Epithelial cell - skin	11	11
					Fish 1: confocal section 19	Epithelial cell - skin	19	19
						fibroblast	6	6
					Fish 1: confocal section 20	Epithelial cell - skin	12	12
						fibroblast	33	33
					Fish 1: confocal section 21	Epithelial cell - skin	13	13
					Fish 1: confocal section 22	Epithelial cell - skin	2	2
					Fish 1: confocal section 23	Epithelial cell - skin	7	7
						fibroblast	11	11
					Fish 1: confocal section 24	Epithelial cell - skin	11	11
						neuron	2	2
						fibroblast	2	2
					Fish 1: confocal section 25	Epithelial cell - skin	11	11
						fibroblast	2	2
					Fish 1: confocal section 26	Epithelial cell - skin	12	12
						fibroblast	2	2
					Fish 1: confocal section 27	Epithelial cell - skin	4	4
						fibroblast	1	1
					Fish 1: confocal section 28	Epithelial cell - skin	2	2
						fibroblast	5	5
					Fish 1: confocal section 29	neuron	1	1
						Epithelial cell - skin	1	1
						fibroblast	4	4
					Fish 1: confocal section 30	fibroblast	2	2
					Fish 1: confocal section 31	fibroblast	2	2
					Fish 1: confocal section 32	fibroblast	3	3
						neuron - PNS (cornea)	1	1
					Fish 1: confocal section 33	fibroblast	2	2
					Fish 1: confocal section 34	fibroblast	4	4
						neuron - PNS (cornea)	2	2
					Fish 1: confocal section 35	epithelial -cornea	8	8
						neuron - PNS (cornea)	1	1
					Fish 1: confocal section 36	epithelial -cornea	6	6
					Fish 1: confocal section 37	epithelial -cornea	4	4
						neuron - PNS (cornea)	1	1
					Fish 1: confocal section 38	epithelial -cornea	4	4
						neuron - PNS (cornea)	1	1
					Fish 1: confocal section 39	epithelial -cornea	8	8
						neuron - PNS (cornea)	2	2
					Fish 2: confocal section 1	epithelial - skin	8	8
					fish 2: confocal section 2	epithelial - skin	6	6
					Fish 3: confocal section 1	Epidermal - skin	5	5
						mandibular cartilage	2	2
					Fish 3: confocal section 2	Epidermal - skin	3	3
						mandibular cartilage	3	3
					Fish 3: confocal section 3	Epidermal - skin	4	4
						mandibular cartilage	3	3
						fibroblast	2	2
					Fish 3: confocal section 4	Epidermal - skin	6	6
						mandibular cartilage	4	4
					Fish 3: confocal section 5	Epidermal - skin	4	4
						mandibular cartilage	4	4
						fibroblast	3	3
					Fish 3: confocal section 6	fibroblast	13	13
						mandibular cartilage	3	3
						Epidermal - skin	4	4
					Fish 3: confocal section 7	fibroblast	13	13
						mandibular cartilage	3	3
						Epidermal - skin	4	4
					Fish 3: confocal section 8	fibroblast	12	12
						mandibular cartilage	1	1
						neuron - PNS	1	1
						Epidermal - skin	1	1
					Fish 3: confocal section 9	fibroblast	14	14
						mandibular cartilage	2	2
						Epidermal - skin	1	1
					Fish 3: confocal section 10	fibroblast	2	2
					Fish 3: confocal section 11	Epidermal - skin	1	1
					Fish 3: confocal section 12	fibroblast	0	0
						neuron - PNS	1	1
					Fish 3: confocal section 13	fibroblast	3	3
					Fish 3: confocal section 14	neuron - PNS	1	1
						fibroblast	1	1
					Fish 3: confocal section 15	neuron - PNS	1	1
						fibroblast	1	1
					Fish 3: confocal section 16	fibroblast	1	1
					Fish 3: confocal section 17	fibroblast	5	5
					Fish 4: confocal section 1	fibroblast	3	3
					Fish 4: confocal section 2	fibroblast	9	8
					Fish 4: confocal section 3	fibroblast	10	10
					Fish 4: confocal section 4	fibroblast	34	34
						neuron - PNS	1	1
					Fish 4: confocal section 5	neuron - PNS	1	1
						fibroblast	43	43
					Fish 4: confocal section 6	fibroblast	5	5
					Fish 4: confocal section 7	neuron - PNS	3	3
						fibroblast	30	30
					Fish 4: confocal section 8	neuron - PNS	3	3
						epithelial - skin	16	16
						fibroblast	5	5
					Fish 4: confocal section 9	epithelial - skin	20	20
						neuron - PNS	1	1
						fibroblast	6	6
					Fish 4: confocal section 10	neuron - PNS	1	1
						fibroblast	6	6
					Fish 4: confocal section 11	fibroblast	17	17
					Fish 4: confocal section 12	epithelial - skin	2	2
					Fish 4: confocal section 13	epithelial - skin	0	0
					Fish 5: confocal section 1	osteoblast - skull	17	17
					Fish 5: confocal section 2	osteoblast - skull	10	10
					Fish 5: confocal section 3	osteoblast - skull	10	10
					Fish 5: confocal section 4	osteoblast - skull	8	7
					Fish 5: confocal section 5	osteoblast - skull	3	3
					Fish 5: confocal section 6	osteoblast - skull	6	5
					Fish 5: confocal section 7	osteoblast - skull	6	6
						neuron - CNS	1	1
					Fish 5: confocal section 8	osteoblast - skull	6	6
						neuron - PNS	1	1
						neuron - CNS	1	1
					Fish 5: confocal section 9	osteoblast - skull	6	6
						neuron - PNS	1	1
						neuron - CNS	0	0
					Fish 5: confocal section 10	osteoblast - skull	5	5
						neuron - PNS	7	7
						neuron - CNS	3	3
					Fish 5: confocal section 11	osteoblast - skull	2	2
						neuron - CNS	7	7
					Fish 5: confocal section 12	neuron - PNS	1	1
						neuron - CNS	6	6
					Fish 5: confocal section 13	neuron - CNS	16	15
					Fish 5: confocal section 14	neuron - CNS	15	15
					Fish 5: confocal section 15	neuron - CNS	19	19
					Fish 5: confocal section 16	neuron - CNS	19	19
					Fish 5: confocal section 17	neuron - CNS	18	18
					Fish 5: confocal section 18	neuron - CNS	6	6
					Fish 5: confocal section 19	neuron - CNS	6	6
					Fish 5: confocal section 20	neuron - CNS	3	3
					Fish 5: confocal section 21	neuron - CNS	2	2
