# Supplementary material for: A calcineurin-mediated scaling mechanism that controls a K+-leak channel to regulate morphogen and growth factor transcription
Source: eLife. 2021 Apr 8;10:e60691. doi: 10.7554/eLife.60691 (PMC8110307; doi:10.7554/eLife.60691)
Supplement: Figure 5—source data 1. [file elife-60691-fig5-data1.xlsx]

## Sheet: Fig 5B-source data 1
	kcnk5b-GFP
		File name	5K7K-A	5K7M-A	5K7O-A	5J27R-A	5J27N-A	5J27M-A	5I07F-A	5I03R-A	5J03M-A	5J03N-A	5J03O-A	5J03Q-A	5J03R-A	5I30U-A	5I30V-A	5I30X-A
		Resistance S	10.1	4.834	8.056	9.894	9.934	11.62	7.4	4.17	7.602	6.804	7.197	10.65	9.601	9.488	10.56	12.3
		Cell Capacitance	25.26	4.9	21.98	25.44	17.43	14.12	9.41	18.02	7.3	9.7	15.1	14.63	11.5	12.33	13.91	14.77
		Current
measured		-100	-8.56198e-11	-3.28985e-10	-1.10979e-10	-8.25413e-11	-8.25413e-11	-1.50984e-10	-2.50603e-10	-1.06776e-10	-5.81744e-10	-1.49894e-10	-3.63378e-10	-1.232e-10	-3.02699e-10	-4.16917e-11	-4.65754e-11	-6.96255e-11
		-90	-4.59504e-11	-7.52789e-11	-7.17097e-11	-5.37397e-11	-5.37397e-11	-1.39514e-10	-1.98999e-10	-7.96564e-11	-2.34632e-10	-6.53383e-11	-1.44473e-10	-1.00098e-10	-2.3367e-10	-3.34414e-11	-3.58394e-11	-4.60589e-11
		-80	8.7655e-12	2.42053e-10	-1.12629e-11	-6.97056e-12	-6.97056e-12	-1.11813e-10	-1.44111e-10	-4.72555e-11	1.24788e-10	6.06302e-11	1.10121e-10	-5.75347e-11	-1.42167e-10	-1.96779e-11	-2.07955e-11	-1.03822e-11
		-70	9.14308e-11	6.0437e-10	6.26679e-11	5.78642e-11	5.78642e-11	-9.84039e-11	-6.13884e-11	-6.80351e-13	5.03748e-10	2.28311e-10	4.06983e-10	8.25039e-12	-1.414e-11	-3.5706e-12	4.20455e-12	5.03383e-11
		-60	2.04354e-10	1.01763e-09	1.61085e-10	1.60801e-10	1.60801e-10	-8.34478e-11	4.46979e-11	6.10574e-11	8.77521e-10	4.43337e-10	7.40276e-10	9.97396e-11	1.20589e-10	1.50058e-11	3.6999e-11	1.14452e-10
		-50	3.89644e-10	1.47063e-09	3.04956e-10	3.04298e-10	3.04298e-10	-5.7358e-11	1.78165e-10	1.46795e-10	1.2921e-09	6.89171e-10	1.10473e-09	2.17762e-10	2.90535e-10	4.77334e-11	9.19809e-11	2.24468e-10
		-40	6.28275e-10	1.95855e-09	4.8031e-10	4.90821e-10	4.90821e-10	-3.54313e-11	3.38506e-10	2.83524e-10	1.74521e-09	1.00298e-09	1.50099e-09	3.88125e-10	4.81415e-10	8.00077e-11	1.48117e-10	3.65183e-10
		-30	9.1923e-10	2.47212e-09	7.25281e-10	7.35315e-10	7.35315e-10	-7.93905e-12	5.58759e-10	4.21415e-10	2.21691e-09	1.34188e-09	1.95985e-09	6.10841e-10	6.85018e-10	1.33553e-10	2.30677e-10	5.35186e-10
		-20	1.33233e-09	3.00488e-09	9.95173e-10	1.02402e-09	1.02402e-09	2.16012e-11	8.10751e-10	6.31635e-10	2.72192e-09	1.7745e-09	2.43596e-09	9.00841e-10	9.06821e-10	1.83301e-10	3.1923e-10	7.59468e-10
		-10	1.78895e-09	3.55143e-09	1.36154e-09	1.41632e-09	1.41632e-09	5.25387e-11	1.15627e-09	9.00986e-10	3.23632e-09	2.23076e-09	3.13111e-09	1.28377e-09	1.13885e-09	2.61503e-10	4.52288e-10	9.63964e-10
		0	2.44695e-09	4.1382e-09	1.78763e-09	1.78431e-09	1.78431e-09	8.64153e-11	1.51265e-09	1.23235e-09	3.77984e-09	2.73342e-09	3.7987e-09	1.69739e-09	1.37303e-09	3.63301e-10	6.1509e-10	1.3905e-09
		10	3.10013e-09	4.74053e-09	2.15824e-09	2.34123e-09	2.34123e-09	1.33662e-10	1.93656e-09	1.60946e-09	4.32109e-09	3.31445e-09	4.51281e-09	2.22686e-09	1.71784e-09	4.53933e-10	8.14899e-10	1.58498e-09
		20	4.04732e-09	5.39867e-09	2.64019e-09	2.78144e-09	2.78144e-09	1.81537e-10	2.38717e-09	2.00413e-09	4.85228e-09	3.9134e-09	5.26407e-09	2.75315e-09	1.95857e-09	5.52654e-10	9.74879e-10	2.00222e-09
		30	4.86908e-09	6.08788e-09	3.13746e-09	3.44712e-09	3.44712e-09	2.26284e-10	2.90535e-09	2.4209e-09	5.38438e-09	4.57954e-09	6.12107e-09	3.33967e-09	2.24879e-09	6.72647e-10	1.17143e-09	2.32991e-09
		40	5.65588e-09	6.83953e-09	3.49804e-09	4.00065e-09	4.00065e-09	3.19646e-10	3.46148e-09	2.84478e-09	5.97101e-09	5.33278e-09	6.97832e-09	3.84867e-09	2.55327e-09	7.7103e-10	1.44172e-09	2.71757e-09
		50	6.5214e-09	7.64434e-09	3.82322e-09	4.61074e-09	4.61074e-09	4.10199e-10	3.9259e-09	3.17704e-09	6.581e-09	6.04564e-09	7.98719e-09	4.46398e-09	2.88337e-09	9.21586e-10	1.67863e-09	3.00762e-09
		60	7.46336e-09	8.45935e-09	3.92407e-09	5.23372e-09	5.23372e-09	5.1931e-10	4.38192e-09	3.46694e-09	7.18543e-09	6.83649e-09	8.91793e-09	4.67055e-09	3.21052e-09	9.95731e-10	1.75642e-09	3.27529e-09
		70	8.30663e-09	9.2748e-09	4.09313e-09	5.7026e-09	5.7026e-09	7.65039e-10	4.73661e-09	3.80023e-09	7.87586e-09	7.64291e-09	9.78733e-09	4.9768e-09	3.56741e-09	1.03265e-09	1.9605e-09	3.3473e-09
standardized		-100	-3.38954	-34.3206	-3.89535	-3.24455	-4.73559	-10.6929	-26.6316	-5.92542	-79.691	-15.453	-24.0648	-8.42105	-26.3217	-3.38132	-3.34834	-4.71398
to Cell Capacitance		-90	-1.8191	-21.349	-2.09056	-2.11241	-3.08317	-9.88059	-21.1476	-4.42044	-32.1414	-6.73591	-9.56775	-6.84197	-20.3191	-2.7122	-2.57652	-3.11841
x 1000000000000		-80	0.347011	-6.58733	0.398794	-0.274	-0.399917	-7.91877	-15.3147	-2.62239	17.0942	6.25054	7.29278	-3.93265	-12.3623	-1.59594	-1.495	-0.702925
		-70	3.61959	14.8128	4.15973	2.27454	3.3198	-6.96911	-6.52374	-0.0377553	69.0066	23.5372	26.9525	0.563936	-1.22957	-0.289586	0.302268	3.40814
		-60	8.09002	41.8361	9.29727	6.32079	9.22553	-5.9099	4.75004	3.38831	120.208	45.7048	49.0249	6.81747	10.486	1.21702	2.65988	7.74895
		-50	15.4253	76.8073	17.7272	11.9614	17.4583	-4.06218	18.9336	8.14623	177	71.0486	73.1609	14.8846	25.2639	3.87132	6.61257	15.1976
		-40	24.8723	120.913	28.5839	19.2933	28.1596	-2.5093	35.973	15.7339	239.07	103.4	99.4033	26.5294	41.8622	6.48886	10.6482	24.7246
		-30	36.3907	178.552	41.8212	28.9039	42.1867	-0.562256	59.3793	23.386	303.686	138.338	129.791	41.7526	59.5668	10.8315	16.5835	36.2347
		-20	52.7447	240.724	60.6156	40.2524	58.7504	1.52983	86.1584	35.0519	372.866	182.938	161.322	61.5749	78.854	14.8663	22.9497	51.4196
		-10	70.8215	309.098	81.3899	55.673	81.2576	3.72087	122.877	49.9992	443.332	229.975	207.358	87.7491	99.0304	21.2087	32.5153	65.265
		0	96.8705	390.102	111.326	70.138	102.37	6.12006	160.749	68.3879	517.786	281.796	251.57	116.021	119.394	29.4648	44.2193	94.1435
		10	122.729	483.098	141.043	92.0295	134.322	9.46615	205.798	89.3152	591.93	341.696	298.862	152.212	149.377	36.8153	58.5837	107.311
		20	160.226	580.716	184.136	109.333	159.578	12.8567	253.684	111.217	664.696	403.443	348.614	188.185	170.31	44.8219	70.0848	135.56
		30	192.759	676.278	221.523	135.5	197.769	16.0258	308.751	134.345	737.586	472.118	405.369	228.275	195.547	54.5537	84.215	157.746
		40	223.907	775.171	257.319	157.258	229.527	22.6378	367.851	157.868	817.947	549.771	462.14	263.067	222.023	62.5328	103.646	183.993
		50	258.171	909.963	296.697	181.24	264.529	29.0509	417.205	176.306	901.507	623.262	528.953	305.125	250.728	74.7434	120.678	203.63
		60	295.462	878.602	339.552	205.728	300.271	36.7783	465.666	192.394	984.305	704.793	590.591	319.245	279.176	80.7568	126.27	221.753
		70	328.845	933.349	377.918	224.159	327.172	54.1812	503.359	210.89	1078.88	787.929	648.168	340.178	310.21	83.751	140.942	226.628
kcnk5b-GFP +CaN
		File name	5K7K-A	5K7I-A	5J27J-A	5J27G-A	5J27E-A	5J27C-A	5J27B-A	5I07N-A	5I03V-A	5I03H-A
		Resistance S	11.09	9.032	11.22	9.046	8.598	10.97	8.493	3.21	10.16	5.903
		Cell Capacitance	13.75	17.85	13.36	9.747	10.47	9.878	15.84	3.35	36.16	12.6
measured		Current
		-100	-8.56198e-11	-3.32738e-11	-7.19421e-11	-1.07526e-10	-7.16865e-11	-7.47598e-11	-1.50984e-10	-2.98171e-10	-1.48413e-10	-4.86268e-10
		-90	-4.59504e-11	-3.31635e-11	-6.56689e-11	-9.83833e-11	-7.30372e-11	-6.17484e-11	-1.39514e-10	-2.27271e-10	-8.69073e-11	-2.2384e-10
		-80	8.7655e-12	-2.91247e-11	-5.91813e-11	-8.7983e-11	-6.44137e-11	-5.30785e-11	-1.11813e-10	-1.90806e-10	9.87085e-13	8.87603e-11
		-70	9.14308e-11	-2.37993e-11	-5.4499e-11	-7.38998e-11	-5.19757e-11	-3.87319e-11	-9.84039e-11	-1.45372e-10	1.24571e-10	4.10888e-10
		-60	2.04354e-10	-1.43383e-11	-4.46229e-11	-6.10666e-11	-4.81844e-11	-2.56689e-11	-8.34478e-11	-1.13864e-10	3.01917e-10	7.57291e-10
		-50	3.89644e-10	-7.94835e-12	-3.72727e-11	-4.62448e-11	-4.12268e-11	-1.00646e-11	-5.7358e-11	-7.19938e-11	5.37004e-10	1.11745e-09
		-40	6.28275e-10	-5.99277e-12	-3.06302e-11	-3.4437e-11	-3.28951e-11	7.16167e-12	-3.54313e-11	-1.6544e-11	8.8976e-10	1.50029e-09
		-30	9.1923e-10	-1.30449e-12	-2.23244e-11	-2.51446e-11	-2.47082e-11	3.78332e-11	-7.93905e-12	4.59871e-11	1.30497e-09	1.90713e-09
		-20	1.33233e-09	-3.59246e-13	-1.16219e-11	-1.66865e-11	-1.3657e-11	4.97882e-11	2.16012e-11	1.19811e-10	1.92331e-09	2.34547e-09
		-10	1.78895e-09	1.61596e-12	-1.54442e-12	6.6374e-13	-2.04287e-12	1.00101e-10	5.25387e-11	1.9871e-10	2.65423e-09	2.75661e-09
		0	2.44695e-09	7.09298e-12	2.28383e-11	1.31663e-11	5.71798e-12	1.29793e-10	8.64153e-11	2.99545e-10	3.6371e-09	3.19671e-09
		10	3.10013e-09	8.54158e-12	3.41322e-11	2.73735e-11	1.66942e-11	1.54401e-10	1.33662e-10	4.26458e-10	4.73125e-09	3.60579e-09
		20	4.04732e-09	1.1827e-11	5.39205e-11	4.08368e-11	2.26911e-11	2.10124e-10	1.81537e-10	5.62113e-10	5.93696e-09	4.04851e-09
		30	4.86908e-09	1.51069e-11	7.33058e-11	5.30398e-11	3.36854e-11	2.38494e-10	2.26284e-10	7.34645e-10	7.59103e-09	4.42686e-09
		40	5.65588e-09	1.74473e-11	9.06818e-11	6.37397e-11	3.26265e-11	2.56994e-10	3.19646e-10	8.43519e-10	9.10914e-09	4.82435e-09
		50	6.5214e-09	1.85573e-11	9.7952e-11	7.50336e-11	3.82645e-11	2.73381e-10	4.10199e-10	1.03777e-09	1.01451e-08	5.34911e-09
		60	7.46336e-09	2.38525e-11	1.19078e-10	7.9561e-11	3.31534e-11	2.53471e-10	5.1931e-10	1.24313e-09	1.12695e-08	5.57477e-09
		70	8.30663e-09	2.44334e-11	1.57528e-10	9.63869e-11	3.45739e-11	2.72482e-10	7.65039e-10	1.42644e-09	1.26925e-08	6.05587e-09
standardized		-100	-12.2306	-9.42134	-5.38489	-11.0317	-6.84685	-7.56831	-9.53182	-89.0063	-4.10434	-38.5927
to Cell Capacitance		-90	-7.608	-5.8605	-4.91534	-10.0937	-6.97585	-6.2511	-8.8077	-67.8421	-2.40341	-17.7651
x 1000000000000		-80	-2.34748	-1.80829	-4.42974	-9.02667	-6.15222	-5.37341	-7.0589	-56.957	0.0272977	7.04447
		-70	5.27873	4.06625	-4.07927	-7.5818	-4.96425	-3.92103	-6.21237	-43.3946	3.44499	32.6102
		-60	14.9089	11.4844	-3.34004	-6.26517	-4.60214	-2.59859	-5.26817	-33.9893	8.34947	60.1025
		-50	27.3713	21.0844	-2.78987	-4.74452	-3.93761	-1.01889	-3.62109	-21.4907	14.8508	88.6865
		-40	43.0889	33.1917	-2.29268	-3.53309	-3.14184	0.725012	-2.23682	-4.93851	24.6062	119.071
		-30	63.6294	49.0142	-1.67099	-2.57973	-2.3599	3.83005	-0.501203	13.7275	36.0888	151.36
		-20	85.7855	66.0812	-0.869903	-1.71196	-1.30439	5.04031	1.36371	35.7645	53.1889	186.148
		-10	110.151	84.8504	-0.1156	0.0680969	-0.195117	10.1337	3.31684	59.3164	73.4024	218.779
		0	139.018	107.087	1.70945	1.35081	0.54613	13.1396	5.45551	89.4164	100.584	253.707
		10	172.159	132.615	2.55481	2.8084	1.59448	15.6308	8.43826	127.301	130.842	286.174
		20	206.946	159.412	4.03597	4.18968	2.16725	21.2719	11.4607	167.795	164.186	321.31
		30	241.001	185.645	5.48696	5.44165	3.21733	24.144	14.2856	219.297	209.929	351.338
		40	276.243	212.792	6.78756	6.53942	3.11619	26.0168	20.1797	251.797	251.912	382.885
		50	324.278	249.794	7.33174	7.69812	3.65468	27.6757	25.8964	309.782	280.561	424.533
		60	313.102	241.185	8.91302	8.16261	3.16651	25.6602	32.7847	371.084	311.657	442.442
		70	332.612	256.213	11.791	9.88888	3.30219	27.5847	48.2979	425.803	351.009	480.625

## Sheet: Fig 5C-Source Data 1
DMSO-treated HEK293T
with Kcnk5b	File name	6A01A-A	6A01B-A												6A07H-A		6A13B-A	6A13D-A	6A22C-A	6A22E-A
	Dish	6A01-01-1	6A01-01-2	6A01-01-4	6A01-01-5	6A01-01-6	6A01-01-7	6A06-01-1	6A06-01-2	6A06-01-3	6A06-01-4	6A06-01-5	6A07-01-1	6A07-01-1	6A07-01-3	6A09-01-08	6A13-01-02	6A13-01-04	6A22-01-01	6A22-01-03
	Resistance S	9.755	8.003	7.405	7.555	8.946	12	6.719	9.097	10.65	9.201	10.99	10.99	9.955	12	9.023	11.41	10.7	7.989	8.694
	Cell Capacitance	23.67	11.31	13	11.32	14.91	13.49	22.22	18.1	10.95	10.82	10	12	22.63	10.69	11.37	14.62	19.14	30	15.23
	Current
	-100	-8.75542e-11	-2.83791e-10	-8.1452e-10	-7.41271e-11	-1.42022e-10	-7.38094e-11	-1.36152e-10	-4.10243e-10	-3.55196e-10	-2.74718e-10	-3.16777e-10	-3.59137e-10	-7.52169e-11	-1.41291e-10	-6.04584e-11	-1.18572e-10	-5.09155e-11	-2.14618e-10	-1.03347e-10
	-90	-5.39385e-11	-1.48133e-10	-3.38833e-10	-6.78332e-11	-1.10702e-10	-5.086e-11	-1.20878e-10	-2.73585e-10	-2.58308e-10	-1.85465e-10	-1.88559e-10	-1.6876e-10	-6.00568e-11	-5.77402e-11	-4.93298e-11	-6.97095e-11	-3.99083e-11	-7.9251e-11	-6.03435e-11
	-80	-9.59969e-12	2.85382e-11	2.43879e-10	-5.69525e-11	-8.45713e-11	-1.39824e-11	-1.09158e-10	-3.45661e-11	-1.2273e-10	-4.88817e-11	-2.84917e-11	7.89979e-11	-5.06896e-11	4.5501e-11	-3.65483e-11	-6.07438e-12	-2.14217e-11	9.86777e-11	-8.72676e-12
	-70	4.42743e-11	2.83572e-10	9.86327e-10	-4.3311e-11	-6.95041e-11	3.21823e-11	-9.44292e-11	2.89861e-10	5.5142e-11	1.23045e-10	1.69742e-10	3.7563e-10	-4.14334e-11	1.80814e-10	-1.88585e-11	8.41426e-11	5.85227e-12	3.54644e-10	7.19008e-11
	-60	1.21588e-10	6.01351e-10	1.86472e-09	-2.78048e-11	-5.98218e-11	9.56767e-11	-8.15961e-11	7.42102e-10	2.68035e-10	3.39455e-10	4.22045e-10	7.16746e-10	-3.16142e-11	3.62546e-10	4.60098e-12	1.99015e-10	4.40134e-11	6.73481e-10	1.85154e-10
	-50	2.27854e-10	1.03459e-09	2.90449e-09	-5.39256e-12	-3.94396e-11	1.83308e-10	-6.5204e-11	1.38192e-09	5.49437e-10	6.31622e-10	7.0751e-10	1.09474e-09	-1.75181e-11	5.86888e-10	3.5696e-11	3.61791e-10	9.72766e-11	1.08462e-09	3.40205e-10
	-40	3.33729e-10	1.55697e-09	4.06601e-09	2.83394e-11	-2.78822e-11	3.0312e-10	-5.328e-11	2.20537e-09	9.18662e-10	9.81534e-10	1.05559e-09	1.50679e-09	-2.58264e-12	8.32314e-10	7.45196e-11	5.75816e-10	1.4977e-10	1.59696e-09	5.24842e-10
	-30	4.80899e-10	2.21871e-09	5.31489e-09	5.71229e-11	-1.25077e-11	4.46645e-10	-3.93259e-11	3.31436e-09	1.37311e-09	1.42709e-09	1.43525e-09	1.9563e-09	9.69525e-12	1.14821e-09	1.30591e-10	8.07898e-10	2.40962e-10	2.21795e-09	7.55894e-10
	-20	6.38962e-10	2.92666e-09	6.6418e-09	9.2562e-11	5.47521e-12	6.1742e-10	-2.58187e-11	4.69873e-09	1.90931e-09	1.95919e-09	1.85251e-09	2.4287e-09	1.92691e-11	1.49737e-09	1.96129e-10	1.09764e-09	3.5028e-10	2.95587e-09	1.1111e-09
	-10	8.62051e-10	3.75322e-09	7.97929e-09	1.35225e-10	2.3874e-11	8.18639e-10	-1.26989e-11	6.2698e-09	2.55982e-09	2.52568e-09	2.36318e-09	2.93576e-09	4.02273e-11	1.88699e-09	2.71878e-10	1.41891e-09	4.71241e-10	3.78472e-09	1.48481e-09
	0	1.07564e-09	4.58064e-09	9.34666e-09	1.711e-10	4.66142e-11	1.05373e-09	2.29855e-13	7.78076e-09	3.25121e-09	3.1972e-09	2.86832e-09	3.44327e-09	5.61699e-11	2.24492e-09	3.83236e-10	1.74581e-09	5.83342e-10	4.66374e-09	1.94057e-09
	10	1.29529e-09	5.46639e-09	1.065e-08	2.16196e-10	6.1547e-11	1.34449e-09	1.3094e-11	9.39428e-09	4.09614e-09	3.74955e-09	3.42456e-09	3.95988e-09	6.70945e-11	2.68208e-09	4.73994e-10	2.12456e-09	7.58294e-10	5.6552e-09	2.44431e-09
	20	1.47359e-09	6.2548e-09	1.19811e-08	2.60785e-10	8.82231e-11	1.61497e-09	2.76885e-11	1.06282e-08	4.81228e-09	4.34415e-09	4.02841e-09	4.52254e-09	9.92381e-11	3.04133e-09	6.46622e-10	2.48527e-09	9.00635e-10	6.59007e-09	2.98544e-09
	30	1.67335e-09	6.99269e-09	1.31372e-08	2.73494e-10	1.35671e-10	1.93418e-09	4.22082e-11	1.16367e-08	5.4013e-09	4.86765e-09	4.70586e-09	5.04416e-09	1.15356e-10	3.39504e-09	7.61348e-10	2.78672e-09	1.11571e-09	7.46855e-09	3.47181e-09
	40	1.73198e-09	7.54501e-09	1.38068e-08	3.057e-10	1.51185e-10	2.20457e-09	6.57154e-11	1.21804e-08	5.84719e-09	5.16478e-09	5.334e-09	5.60303e-09	1.35005e-10	3.61835e-09	9.02864e-10	3.08942e-09	1.33039e-09	8.29015e-09	3.95782e-09
	50	1.82245e-09	7.98129e-09	1.43775e-08	3.16823e-10	1.52911e-10	2.52291e-09	8.25103e-11	1.25178e-08	5.60282e-09	5.56473e-09	5.99493e-09	6.16858e-09	1.33546e-10	3.73637e-09	1.00397e-09	3.17925e-09	1.451e-09	9.38245e-09	4.40771e-09
	60	1.79018e-09	8.09842e-09	1.49243e-08	3.13802e-10	1.85085e-10	2.76774e-09	8.28926e-11	1.22143e-08	5.48232e-09	5.60153e-09	6.69222e-09	6.68705e-09	1.39104e-10	3.69947e-09	1.17806e-09	3.31389e-09	1.57383e-09	1.06153e-08	4.56591e-09
	70	1.61166e-09	7.80002e-09	1.53773e-08	2.97012e-10	2.3757e-10	2.96753e-09	1.01426e-10	1.13286e-08	5.13757e-09	5.51093e-09	7.25355e-09	7.21629e-09	1.53851e-10	3.48196e-09	1.18806e-09	3.23513e-09	1.70662e-09	1.19714e-08	4.65862e-09
standardized	-100	-3.69895	-25.092	-62.6554	-6.54833	-9.52529	-5.47142	-6.12745	-22.6654	-32.438	-25.3898	-31.6777	-29.9281	-3.32377	-13.2171	-5.31736	-8.11026	-2.66016	-7.15393	-6.78575
to Cell Capacitance	-90	-2.27877	-13.0975	-26.0641	-5.99233	-7.42468	-3.7702	-5.44005	-15.1152	-23.5898	-17.1409	-18.8559	-14.0633	-2.65386	-5.40133	-4.33859	-4.76809	-2.08507	-2.6417	-3.96215
x 1000000000000	-80	-0.405564	2.52327	18.7599	-5.03114	-5.67212	-1.0365	-4.9126	-1.90973	-11.2082	-4.51772	-2.84917	6.58316	-2.23993	4.25641	-3.21445	-0.415484	-1.11921	3.28926	-0.572998
	-70	1.87048	25.0727	75.8713	-3.82606	-4.66158	2.38564	-4.24974	16.0144	5.0358	11.372	16.9742	31.3025	-1.83091	16.9143	-1.65862	5.75531	0.305761	11.8215	4.721
	-60	5.1368	53.1698	143.44	-2.45625	-4.01219	7.09242	-3.67219	41.0001	24.4781	31.3729	42.2045	59.7288	-1.397	33.9145	0.40466	13.6125	2.29955	22.4494	12.1572
	-50	9.62628	91.4757	223.422	-0.476375	-2.64518	13.5884	-2.93447	76.3492	50.1769	58.3754	70.751	91.2283	-0.77411	54.9007	3.13949	24.7463	5.08237	36.154	22.3378
	-40	14.0992	137.663	312.77	2.50348	-1.87003	22.47	-2.39784	121.844	83.8961	90.7148	105.559	125.566	-0.114125	77.8591	6.55405	39.3855	7.82497	53.232	34.4611
	-30	20.3168	196.172	408.838	5.04619	-0.83888	33.1093	-1.76984	183.114	125.398	131.894	143.525	163.025	0.428425	107.41	11.4856	55.2598	12.5894	73.9317	49.6319
	-20	26.9946	258.767	510.908	8.17686	0.367217	45.7687	-1.16196	259.598	174.366	181.071	185.251	202.392	0.851485	140.072	17.2497	75.078	18.3009	98.529	72.9547
	-10	36.4196	331.85	613.792	11.9457	1.60121	60.6849	-0.571508	346.398	233.774	233.427	236.318	244.647	1.77761	176.519	23.9119	97.0527	24.6207	126.157	97.4924
	0	45.4432	405.008	718.974	15.1148	3.12637	78.1119	0.0103445	429.876	296.914	295.49	286.832	286.939	2.4821	210.002	33.7059	119.412	30.4776	155.458	127.418
	10	54.7229	483.324	819.231	19.0986	4.1279	99.6657	0.589289	519.021	374.077	346.539	342.456	329.99	2.96485	250.896	41.6881	145.319	39.6183	188.507	160.493
	20	62.2556	553.033	921.623	23.0375	5.91704	119.716	1.24611	587.193	439.478	401.493	402.841	376.878	4.38525	284.502	56.8709	169.991	47.0551	219.669	196.024
	30	70.695	618.275	1010.55	24.1602	9.09933	143.379	1.89956	642.912	493.269	449.875	470.586	420.347	5.09748	317.59	66.9611	190.61	58.2921	248.952	227.959
	40	73.1719	667.11	1062.06	27.0053	10.1398	163.423	2.95749	672.95	533.99	477.336	533.4	466.919	5.96575	338.48	79.4076	211.315	69.5084	276.338	259.87
	50	76.9941	705.684	1105.96	27.9879	10.2556	187.021	3.71333	691.591	511.673	514.3	599.493	514.048	5.90128	349.52	88.2999	217.459	75.8098	312.748	289.41
	60	75.6308	716.041	1148.02	27.721	12.4135	205.17	3.73054	674.823	500.668	517.701	669.222	557.254	6.14688	346.068	103.611	226.668	82.2273	353.843	299.797
	70	68.0887	689.657	1182.87	26.2378	15.9336	219.98	4.56463	625.89	469.184	509.328	725.355	601.357	6.79854	325.721	104.491	221.281	89.1651	399.047	305.884
FK506-treated Hek293T
with Kcnk5b	File name	6A09I-A	6A09K-A	6A09L-A	6A09M-A	6A09N-A	6A13E-A	6A13F-A	6A13G-A	6A22H-A	6A22G-A	6A22H-A	6A22I-A
	Dish	6A09-1-10T	6A09-1-11T	6A09-1-12T	6A09-1-13T	6A09-1-14T	6A13-1-5T	6A13-1-6T	6A13-1-7T	6A22-1-7T	6A22-1-5T	6A22-1-6T	6A22-1-7T
	Resistance S	8.364	5.399	9.347	9.237	10.41	7.008	5.546	5.549	5	10	5	6.316
	Cell Capacitance	12.27	11.82	11.39	12.34	11.49	20	14.21	11.84	20.01	20.01	20.01	16.85
Measured	Current
	-100	-1.39494e-10	-1.53228e-10	-8.05527e-11	-1.10217e-10	-5.18285e-11	-1.52275e-09	-1.47732e-10	-1.25599e-10	-5.36534e-10	-1.58884e-10	-5.36534e-10	-2.45496e-10
	-90	1.6937e-11	-3e-11	-6.26601e-11	-4.36364e-11	-4.172e-11	-1.24531e-09	-6.92717e-11	-7.47934e-11	-3.19019e-10	-7.59246e-11	-3.19019e-10	-1.29835e-10
	-80	1.72805e-10	1.33735e-10	-2.77221e-11	5.1782e-11	-2.81405e-11	-8.74406e-10	5.18595e-11	-7.64463e-13	2.37655e-11	6.28512e-11	2.37655e-11	2.24122e-11
	-70	4.50336e-10	3.67438e-10	1.27996e-11	1.9969e-10	-1.07541e-11	-3.73205e-10	2.31596e-10	9.91374e-11	4.93982e-10	2.65196e-10	4.93982e-10	2.5062e-10
	-60	8.5186e-10	6.81012e-10	7.00981e-11	4.02056e-10	1.12397e-11	2.66361e-10	4.85997e-10	2.39814e-10	1.12871e-09	5.40739e-10	1.12871e-09	5.65842e-10
	-50	1.42896e-09	1.13089e-09	1.42562e-10	6.91369e-10	4.94163e-11	1.06694e-09	8.15176e-10	4.39752e-10	1.94729e-09	9.25372e-10	1.94729e-09	9.5686e-10
	-40	2.14494e-09	1.73048e-09	2.32996e-10	1.09594e-09	8.73709e-11	2.04396e-09	1.26896e-09	7.01648e-10	2.95908e-09	1.4079e-09	2.95908e-09	1.47372e-09
	-30	3.24755e-09	2.44834e-09	3.56457e-10	1.62541e-09	1.42355e-10	3.17946e-09	1.85067e-09	1.02166e-09	4.07394e-09	2.04206e-09	4.07394e-09	2.10852e-09
	-20	4.53185e-09	3.36961e-09	5.14194e-10	2.35187e-09	2.09153e-10	4.47158e-09	2.62256e-09	1.42437e-09	5.48059e-09	2.90699e-09	5.48059e-09	2.85168e-09
	-10	6.20348e-09	4.3426e-09	6.797e-10	3.18841e-09	2.91338e-10	5.96977e-09	3.47757e-09	1.93309e-09	6.88218e-09	3.91163e-09	6.88218e-09	3.68105e-09
	0	8.08599e-09	5.56722e-09	8.69422e-10	4.22134e-09	3.38011e-10	7.45049e-09	4.46586e-09	2.50423e-09	8.43028e-09	5.13121e-09	8.43028e-09	4.6006e-09
	10	9.86173e-09	6.88337e-09	1.06704e-09	5.44139e-09	4.6345e-10	9.04852e-09	5.52864e-09	3.14312e-09	1.00279e-08	6.40636e-09	1.00279e-08	5.52358e-09
	20	1.16192e-08	8.2852e-09	1.32261e-09	6.83741e-09	5.92846e-10	1.05999e-08	6.69381e-09	3.79185e-09	1.16015e-08	7.80292e-09	1.16015e-08	6.41753e-09
	30	1.34276e-08	9.44621e-09	1.49078e-09	8.06977e-09	7.60894e-10	1.22185e-08	8.06054e-09	4.56832e-09	1.3083e-08	9.20793e-09	1.3083e-08	7.10247e-09
	40	1.40876e-08	1.06885e-08	1.71457e-09	9.48548e-09	8.88755e-10	1.36138e-08	9.07351e-09	5.20298e-09	1.40357e-08	1.0628e-08	1.40357e-08	7.88409e-09
	50	1.4661e-08	1.15799e-08	1.79431e-09	1.07824e-08	9.07753e-10	1.49163e-08	1.01623e-08	5.76648e-09	1.47879e-08	1.22224e-08	1.47879e-08	8.48128e-09
	60	1.52629e-08	1.24833e-08	1.9001e-09	1.15324e-08	1.06648e-09	1.61773e-08	1.10004e-08	6.0727e-09	1.55518e-08	1.34122e-08	1.55518e-08	8.76817e-09
	70	1.58215e-08	1.27048e-08	1.85414e-09	1.19252e-08	1.09841e-09	1.7041e-08	1.1267e-08	6.20486e-09	1.63149e-08	1.4208e-08	1.63149e-08	8.73231e-09
standardized	-100	-11.3687	-12.9635	-7.07223	-8.93169	-4.51075	-76.1375	-10.3963	-10.608	-26.8133	-7.94023	-26.8133	-14.5695
to Cell Capacitance	-90	1.38036	-2.53807	-5.50133	-3.53618	-3.63098	-62.2655	-4.87486	-6.31701	-15.943	-3.79433	-15.943	-7.70534
x 1000000000000	-80	14.0835	11.3143	-2.4339	4.19627	-2.44913	-43.7203	3.64951	-0.0645661	1.18768	3.14099	1.18768	1.3301
	-70	36.7022	31.0861	1.12376	16.1823	-0.935953	-18.6602	16.2981	8.37309	24.6868	13.2532	24.6868	14.8736
	-60	69.4262	57.6152	6.15435	32.5815	0.978216	13.3181	34.2011	20.2546	56.4073	27.0234	56.4073	33.5811
	-50	116.46	95.676	12.5164	56.0267	4.30081	53.347	57.3664	37.1412	97.3158	46.2455	97.3158	56.7869
	-40	174.812	146.403	20.4562	88.812	7.60408	102.198	89.3005	59.2608	147.88	70.3598	147.88	87.4611
	-30	264.674	207.135	31.2956	131.719	12.3895	158.973	130.237	86.2889	203.595	102.052	203.595	125.135
	-20	369.344	285.077	45.1443	190.589	18.203	223.579	184.557	120.302	273.893	145.277	273.893	169.239
	-10	505.581	367.394	59.6752	258.38	25.3558	298.488	244.727	163.268	343.937	195.484	343.937	218.46
	0	659.005	471	76.332	342.086	29.4178	372.524	314.276	211.506	421.303	256.432	421.303	273.033
	10	803.727	582.349	93.6822	440.955	40.3351	452.426	389.067	265.466	501.144	320.158	501.144	327.809
	20	946.96	700.948	116.12	554.085	51.5967	529.995	471.063	320.258	579.785	389.951	579.785	380.862
	30	1094.34	799.172	130.885	653.952	66.2223	610.925	567.244	385.838	653.823	460.166	653.823	421.512
	40	1148.13	904.272	150.533	768.677	77.3503	680.69	638.53	439.441	701.434	531.134	701.434	467.899
	50	1194.87	979.687	157.534	873.776	79.0037	745.815	715.151	487.034	739.025	610.815	739.025	503.34
	60	1243.92	1056.12	166.822	934.554	92.8181	808.865	774.131	512.897	777.201	670.275	777.201	520.366
	70	1289.45	1074.86	162.787	966.386	95.597	852.05	792.892	524.059	815.337	710.045	815.337	518.238

## Sheet: Fig 5D-source data1
Kcnk5bS345LVIP
	File name	6G23C-A	6G23D-A	6G23E-A	6G23Q-A	6G23R-A	6G23C-A	6G23D-A	6G23E-A	6G23Q-A	6G23R-A
	Dish	6G23-1-3	6G23-1-4	6G23-1-5	6G23-1-6	6G23-1-7	6G23-1-3	6G23-1-4	6G23-1-5	6G23-1-6	6G23-1-7
	Resistance S	3.898	6.285	8.437	8.583	3.59	4.09	6.749	8.423	7.835	3.783
	Cell Capacitance	13.2	19.46	17.78	16.26	17.5	12.95	18.34	18.44	15.2	17.15
	Current
Measured	-100	-1.73936e-10	-4.18595e-11	-3.39734e-10	-8.51059e-11	-1.1694e-10	-8.17045e-11	-1.04086e-10	-5.92484e-11	-2.54264e-10	-1.28378e-10
	-90	-5.78512e-11	-3.55165e-11	-3.02709e-10	-5.95403e-11	-9.58729e-11	-2.91477e-11	-8.49509e-11	-3.63094e-11	-2.20504e-10	-9.86493e-11
	-80	1.13822e-10	-2.72934e-11	-2.48391e-10	-4.80579e-11	-6.32206e-11	4.97107e-11	-7.09401e-11	-3.38017e-11	-1.69445e-10	-6.16245e-11
	-70	3.65522e-10	-1.7048e-11	-1.9868e-10	-1.85563e-11	-2.05398e-11	1.71095e-10	-5.84427e-11	-4.70222e-11	-1.09961e-10	-2.37474e-11
	-60	7.14251e-10	-1.03306e-13	-1.54525e-10	1.77169e-11	3.75026e-11	3.37268e-10	-3.69912e-11	-3.6751e-11	-7.21643e-11	1.57102e-11
	-50	1.16702e-09	2.15883e-11	-1.1297e-10	7.28745e-11	1.10307e-10	5.68998e-10	-2.0062e-11	-2.92743e-11	8.50207e-12	7.51085e-11
	-40	1.63519e-09	4.76111e-11	-7.63946e-11	1.60656e-10	2.15488e-10	8.8843e-10	-7.45351e-12	-8.31612e-12	7.00594e-11	1.39527e-10
	-30	2.3644e-09	8.58858e-11	-2.59814e-11	3.05083e-10	3.64248e-10	1.28235e-09	1.74793e-11	-5.73347e-13	1.46795e-10	2.36338e-10
	-20	3.17004e-09	1.30274e-10	1.39876e-11	4.82678e-10	5.45708e-10	1.72397e-09	4.43673e-11	1.76937e-11	2.63306e-10	3.25462e-10
	-10	4.00557e-09	1.8165e-10	5.82128e-11	7.38381e-10	7.50697e-10	2.31741e-09	8.49948e-11	3.8781e-11	3.83427e-10	4.7735e-10
	0	4.81504e-09	2.40083e-10	1.0593e-10	1.08934e-09	1.08052e-09	2.85177e-09	1.07038e-10	5.6281e-11	5.58613e-10	6.1617e-10
	10	5.83293e-09	2.9094e-10	1.44109e-10	1.54281e-09	1.51581e-09	3.53992e-09	1.23169e-10	7.52428e-11	6.97608e-10	7.78091e-10
	20	6.97419e-09	4.33272e-10	2.02818e-10	2.04931e-09	1.9595e-09	4.20811e-09	1.61849e-10	9.6671e-11	9.70795e-10	9.73714e-10
	30	7.98818e-09	6.20217e-10	2.66488e-10	2.81561e-09	2.42432e-09	4.97673e-09	2.08848e-10	1.17534e-10	1.12265e-09	1.12248e-09
	40	8.87559e-09	6.70506e-10	2.83409e-10	3.5572e-09	2.9456e-09	5.64952e-09	2.09721e-10	1.75418e-10	1.27177e-09	1.34365e-09
	50	9.83409e-09	7.37048e-10	2.85054e-10	4.59813e-09	3.47183e-09	6.24553e-09	2.6829e-10	1.63187e-10	1.47861e-09	1.45577e-09
	60	1.06458e-08	8.7148e-10	2.93396e-10	5.44105e-09	4.0504e-09	6.95325e-09	2.79246e-10	1.68221e-10	1.74991e-09	1.55449e-09
	70	1.15604e-08	9.25467e-10	2.91968e-10	6.6094e-09	4.29037e-09	7.69535e-09	3.05139e-10	2.0188e-10	2.02979e-09	1.76158e-09
	Current
standardized	-100	-13.177	-2.15105	-19.1076	-5.23407	-6.68229	-6.30923	-5.67535	-3.21304	-16.7279	-7.4856
to Cell Capacitance	-90	-4.38267	-1.8251	-17.0253	-3.66177	-5.47845	-2.25079	-4.632	-1.96906	-14.5068	-5.75215
x 1000000000000	-80	8.62288	-1.40254	-13.9702	-2.95559	-3.61261	3.83866	-3.86805	-1.83306	-11.1477	-3.59327
	-70	27.6911	-0.876053	-11.1744	-1.14122	-1.1737	13.212	-3.18662	-2.55001	-7.23428	-1.38469
	-60	54.1099	-0.00530863	-8.69094	1.0896	2.14301	26.0439	-2.01697	-1.993	-4.74765	0.916047
	-50	88.4106	1.10937	-6.35377	4.48183	6.30326	43.9381	-1.09389	-1.58754	0.559347	4.3795
	-40	123.878	2.44661	-4.29666	9.88044	12.3136	68.6046	-0.406407	-0.450983	4.60917	8.13569
	-30	179.121	4.41345	-1.46127	18.7628	20.8142	99.0232	0.95307	-0.0310926	9.65757	13.7806
	-20	240.155	6.69445	0.786704	29.685	31.1833	133.125	2.41915	0.959528	17.3228	18.9774
	-10	303.452	9.33453	3.27406	45.4109	42.897	178.951	4.63439	2.10309	25.2255	27.8338
	0	364.776	12.3373	5.95782	66.9951	61.744	220.214	5.83631	3.05211	36.7509	35.9283
	10	441.889	14.9507	8.10512	94.8838	86.6177	273.353	6.71587	4.08041	45.8953	45.3697
	20	528.348	22.2647	11.4071	126.034	111.971	324.951	8.82492	5.24246	63.8681	56.7763
	30	605.165	31.8714	14.9881	173.162	138.533	384.303	11.3876	6.37386	73.8586	65.4507
	40	672.393	34.4556	15.9398	218.77	168.32	436.256	11.4352	9.51291	83.6691	78.3469
	50	745.007	37.875	16.0323	282.788	198.39	482.28	14.6287	8.84962	97.277	84.8845
	60	806.5	44.7831	16.5015	334.628	231.451	536.931	15.2261	9.12261	115.126	90.6408
	70	875.788	47.5574	16.4211	406.482	245.164	594.236	16.6379	10.9479	133.539	102.716
Kcnk5bmutVATA
	File name	7D12D-A	7D12D-A	7D12K-A	7D19B-A	7D19B-A cell two	7D24B-A	7D24C-A	7D24I-A	7D24K-A
	Dish	7D12-2-1 cell one	7D12-2-1 cell two	7D12-2-2	7D19-2-1 cell one	7D19-2-1 cell two	7D24-2-1	7D24-2-2	7D24-2-3	7D24-2-4
	Rs	7.24	5.338	5.35	4.758	4.318	3.008	9.36	6.35	6.503
	Ccell	28.47	18.01	18.21	19.88	16.13	19.4	25.72	31.93	20.28
	Current reads
	-100	-5.86932e-11	-5.7061e-11	-1.10653e-10	-1.25702e-10	-1.54233e-10	-3.85762e-10	2.90444e-11	-1.32221e-10	-2.39966e-10
	-90	-4.24458e-11	-5.06818e-11	-9.65625e-11	-1.08518e-10	-1.22268e-10	-3.41043e-10	1.04778e-10	-1.00695e-10	-1.53561e-10
	-80	-2.3422e-11	-4.12758e-11	-8.63326e-11	-7.94706e-11	-1.07988e-10	-2.69135e-10	2.05395e-10	-5.711e-11	1.8595e-13
	-70	3.70351e-12	-3.06663e-11	-7.01937e-11	-3.61183e-11	-9.41632e-11	-1.91167e-10	3.5079e-10	-6.76395e-12	1.93179e-10
	-60	4.75852e-11	-1.88662e-11	-5.44964e-11	3.20119e-11	-7.18931e-11	-1.04075e-10	5.32676e-10	7.64799e-11	4.4298e-10
	-50	1.13246e-10	1.3249e-12	-3.43311e-11	1.45907e-10	-5.19086e-11	3.43414e-11	7.60395e-10	1.88949e-10	7.40762e-10
	-40	2.00842e-10	2.1609e-11	-1.39385e-11	2.94034e-10	-1.58626e-11	1.96893e-10	9.94184e-10	3.36516e-10	1.05522e-09
	-30	3.26813e-10	4.88352e-11	1.66942e-11	5.15589e-10	2.41529e-11	3.88048e-10	1.23888e-09	5.04442e-10	1.34617e-09
	-20	5.01433e-10	7.75723e-11	5.67975e-11	8.25196e-10	8.57257e-11	6.88554e-10	1.50233e-09	7.18977e-10	1.67358e-09
	-10	6.89713e-10	1.34318e-10	1.24298e-10	1.25565e-09	1.4032e-10	9.83461e-10	1.78985e-09	9.62299e-10	2.04966e-09
	0	9.99504e-10	1.90276e-10	2.0094e-10	1.76855e-09	2.14331e-10	1.36228e-09	2.07893e-09	1.3028e-09	2.28372e-09
	10	1.28744e-09	2.89148e-10	2.84117e-10	2.37616e-09	2.96444e-10	1.63771e-09	2.39898e-09	1.66078e-09	2.59806e-09
	20	1.68659e-09	3.29429e-10	3.68822e-10	3.2271e-09	4.15152e-10	2.1615e-09	2.71722e-09	1.98862e-09	2.9053e-09
	30	2.06307e-09	4.17637e-10	4.95067e-10	4.21541e-09	5.4892e-10	2.7679e-09	3.05162e-09	2.34825e-09	3.2402e-09
	40	2.48058e-09	5.37397e-10	6.56111e-10	5.31433e-09	7.41374e-10	3.32638e-09	3.43205e-09	2.68722e-09	3.56498e-09
	50	2.92036e-09	6.56441e-10	7.89943e-10	6.42588e-09	8.82058e-10	3.73063e-09	3.7426e-09	3.0982e-09	3.91649e-09
	60	3.43047e-09	7.30178e-10	9.99773e-10	7.67378e-09	9.78456e-10	4.35254e-09	4.17742e-09	3.51075e-09	4.43441e-09
	70	3.788e-09	7.44509e-10	1.10003e-09	8.80853e-09	1.14104e-09	4.63654e-09	4.67692e-09	3.84556e-09	5.3498e-09
standardized	-100	-2.06158	-3.1683	-6.0765	-6.32304	-9.56187	-19.8846	1.12925	-4.14096	-11.8326
to Cell Capacitance	-90	-1.4909	-2.81409	-5.30272	-5.45865	-7.58016	-17.5795	4.07379	-3.15362	-7.57204
x 1000000000000	-80	-0.822691	-2.29183	-4.74094	-3.99752	-6.69485	-13.8729	7.98581	-1.7886	0.00916913
	-70	0.130085	-1.70274	-3.85468	-1.81682	-5.83777	-9.85397	13.6388	-0.211837	9.52559
	-60	1.67142	-1.04754	-2.99266	1.61026	-4.4571	-5.36469	20.7106	2.39524	21.8432
	-50	3.97773	0.0735647	-1.88529	7.33939	-3.21814	1.77018	29.5643	5.9176	36.5267
	-40	7.05451	1.19983	-0.765431	14.7904	-0.983422	10.1491	38.6541	10.5392	52.0325
	-30	11.4792	2.71156	0.91676	25.9351	1.49739	20.0025	48.168	15.7984	66.3792
	-20	17.6127	4.30718	3.11903	41.5089	5.31467	35.4925	58.411	22.5173	82.5237
	-10	24.226	7.45797	6.82581	63.1615	8.69932	50.6939	69.5898	30.1378	101.068
	0	35.1073	10.565	11.0346	88.9613	13.2877	70.2206	80.8293	40.8018	112.609
	10	45.2209	16.0549	15.6023	119.525	18.3784	84.418	93.2729	52.0132	128.109
	20	59.241	18.2914	20.2538	162.329	25.7379	111.418	105.646	62.2806	143.259
	30	72.4647	23.1892	27.1865	212.043	34.031	142.675	118.648	73.5437	159.773
	40	87.1296	29.8388	36.0303	267.32	45.9624	171.463	133.439	84.1597	175.788
	50	102.577	36.4487	43.3796	323.233	54.6843	192.301	145.513	97.031	193.121
	60	120.494	40.5429	54.9024	386.005	60.6606	224.358	162.419	109.951	218.659
	70	133.052	41.3386	60.408	443.085	70.7402	238.997	181.84	120.437	263.797
Kcnk5bLVIP+CaN
	File name	7D12C-A	7D12C-A	7D19C-A	7D19C-A cell three	7D24D-A
	Dish	7D12-5-1 cell one	7D12-5-1 cell two	7D19-5-1 cell one	7D19-5-1 cell three	7D25-3-1
	Rs	6.495	9.306	6.701	4.028	5.702
	Ccell	23.18	20.39	15.86	28.38	19.78
	Current reads
	-100	-1.11942e-10	-1.11942e-10	-1.28908e-10	-1.47998e-10	-8.60046e-11
	-90	-9.33626e-11	-9.33626e-11	-1.11614e-10	-1.38316e-10	-8.22443e-11
	-80	-7.47779e-11	-7.47779e-11	-9.53796e-11	-9.58626e-11	-6.31947e-11
	-70	-6.67588e-11	-6.67588e-11	-8.17175e-11	-6.49948e-11	-5.37629e-11
	-60	-5.28848e-11	-5.28848e-11	-6.84607e-11	-2.19163e-11	-4.48399e-11
	-50	-4.41787e-11	-4.41787e-11	-5.56818e-11	3.00775e-11	-3.03564e-11
	-40	-3.75801e-11	-3.75801e-11	-3.98735e-11	9.85718e-11	-2.14644e-11
	-30	-2.35718e-11	-2.35718e-11	-1.99019e-11	1.93399e-10	-1.04055e-11
	-20	-1.25465e-11	-1.25465e-11	4.79339e-12	3.08135e-10	1.51601e-12
	-10	2.27712e-11	2.27712e-11	3.35279e-11	4.53458e-10	9.67975e-12
	0	3.99251e-11	3.99251e-11	6.7345e-11	6.62552e-10	2.79623e-11
	10	7.9827e-11	7.9827e-11	1.33786e-10	8.59186e-10	5.90883e-11
	20	1.17162e-10	1.17162e-10	1.93326e-10	1.1054e-09	8.52867e-11
	30	1.53017e-10	1.53017e-10	2.80101e-10	1.37681e-09	1.06963e-10
	40	2.04525e-10	2.04525e-10	3.17859e-10	1.61226e-09	1.3134e-10
	50	2.16761e-10	2.16761e-10	3.66568e-10	1.91904e-09	1.54194e-10
	60	3.05483e-10	3.05483e-10	4.15762e-10	2.22597e-09	1.92704e-10
	70	3.77505e-10	3.77505e-10	4.83342e-10	2.49424e-09	2.01878e-10
standardized	-100	-4.82925	-5.49004	-8.12787	-5.21487	-4.34806
to Cell Capacitance	-90	-4.02772	-4.57884	-7.03745	-4.87371	-4.15795
x 1000000000000	-80	-3.22597	-3.66738	-6.01385	-3.37782	-3.19488
	-70	-2.88002	-3.2741	-5.15243	-2.29016	-2.71804
	-60	-2.28148	-2.59366	-4.31656	-0.772245	-2.26693
	-50	-1.9059	-2.16668	-3.51083	1.05981	-1.5347
	-40	-1.62123	-1.84307	-2.51409	3.47328	-1.08516
	-30	-1.0169	-1.15605	-1.25485	6.81462	-0.526062
	-20	-0.541264	-0.615326	0.302231	10.8575	0.0766436
	-10	0.982364	1.11678	2.11399	15.9781	0.489371
	0	1.72239	1.95807	4.24622	23.3457	1.41367
	10	3.44379	3.91501	8.43544	30.2743	2.98728
	20	5.05444	5.74605	12.1895	38.95	4.31176
	30	6.60125	7.50451	17.6608	48.5134	5.40763
	40	8.82334	10.0307	20.0416	56.8097	6.64004
	50	9.35121	10.6308	23.1127	67.6195	7.79545
	60	13.1787	14.982	26.2145	78.4345	9.74237
	70	16.2858	18.5142	30.4755	87.8872	10.2062
Kcnk5bmutVATA+CaN
	File name	7D12E-A	7D12E-A	7D12J-A	7D19D-A	7D24F-A	7D24F-A	7D24J-A	6B14M-A
	Dish	7D12-6-1 cell one	7D12-6-1 cell two	7D12-6-2	7D19-6-1	7D24-4-2	7D24-4-2 cell two	7D24-4-4	6B14-4-1
	Rs	9.396	4.972	7	5.77	4.749	4.494	6.196	2.098
	Ccell	15.13	24.24	25.48	22.25	28.61	25.35	23.84	15.01
	Current reads
	-100	-7.30811e-11	-2.20602e-10	-1.20072e-10	-2.39109e-10	-1.94205e-10	-7.97779e-11	-1.96785e-10	-6.32789e-10
	-90	-6.48244e-11	-2.0358e-10	-7.77531e-11	-1.83017e-10	-1.15134e-10	-6.48295e-11	-1.47955e-10	-3.72676e-11
	-80	-5.68647e-11	-1.3532e-10	-3.05553e-11	-1.55382e-10	9.41632e-12	-4.80501e-11	-8.53228e-11	6.82402e-10
	-70	-4.94086e-11	-7.49303e-11	4.53151e-11	-8.76627e-11	1.76798e-10	-2.48011e-11	-1.14282e-11	1.50376e-09
	-60	-4.08755e-11	4.31302e-12	1.42663e-10	-5.63017e-12	4.14509e-10	-2.53099e-12	9.77867e-11	2.40554e-09
	-50	-3.14695e-11	1.17805e-10	2.6788e-10	9.78177e-11	7.07014e-10	3.64592e-11	2.43244e-10	3.37638e-09
	-40	4.17872e-12	2.74551e-10	4.45418e-10	2.33765e-10	1.06592e-09	8.11312e-11	4.46906e-10	4.39944e-09
	-30	-4.32851e-12	4.81844e-10	6.61805e-10	3.76209e-10	1.56011e-09	1.36149e-10	7.07149e-10	5.46273e-09
	-20	3.6485e-11	7.41111e-10	9.15271e-10	5.65431e-10	2.15548e-09	2.28827e-10	1.00563e-09	6.5543e-09
	-10	4.20351e-11	1.04408e-09	1.13779e-09	7.72714e-10	2.68539e-09	3.52614e-10	1.42156e-09	7.66897e-09
	0	8.25129e-11	1.4415e-09	1.4064e-09	9.97849e-10	3.513e-09	5.4634e-10	1.80878e-09	8.81046e-09
	10	1.1858e-10	1.91079e-09	1.74451e-09	1.22801e-09	4.51228e-09	7.35062e-10	2.38965e-09	9.94163e-09
	20	1.89401e-10	2.50474e-09	2.03794e-09	1.45383e-09	5.59867e-09	8.89527e-10	2.8533e-09	1.10372e-08
	30	1.9313e-10	3.12262e-09	2.36983e-09	1.75056e-09	7.03401e-09	1.1825e-09	3.52643e-09	1.21113e-08
	40	2.76255e-10	3.5941e-09	2.6871e-09	2.02505e-09	8.31256e-09	1.35778e-09	4.04504e-09	1.3183e-08
	50	3.61408e-10	4.23708e-09	2.97075e-09	2.32089e-09	9.61332e-09	1.62921e-09	4.55911e-09	1.40853e-08
	60	3.65034e-10	4.85885e-09	3.30276e-09	2.60573e-09	1.08938e-08	1.88483e-09	5.21154e-09	1.46911e-08
	70	4.47399e-10	5.45296e-09	3.64174e-09	2.91345e-09	1.17524e-08	2.03346e-09	5.74309e-09	1.53479e-08
standardized	-100	-4.83021	-9.10074	-4.7124	-10.7465	-6.78801	-3.14706	-8.2544	-42.1578
to Cell Capacitance	-90	-4.28449	-8.39851	-3.05153	-8.22548	-4.02426	-2.55738	-6.20617	-2.48285
x 1000000000000	-80	-3.75841	-5.58251	-1.19919	-6.98346	0.329127	-1.89547	-3.57898	45.4632
	-70	-3.2656	-3.09118	1.77846	-3.9399	6.17959	-0.978347	-0.479371	100.184
	-60	-2.70162	0.17793	5.59902	-0.253041	14.4883	-0.0998418	4.10179	160.262
	-50	-2.07994	4.85994	10.5133	4.3963	24.7121	1.43823	10.2032	224.942
	-40	0.276188	11.3264	17.4811	10.5063	37.2569	3.20044	18.7461	293.101
	-30	-0.286088	19.8781	25.9735	16.9083	54.5302	5.37077	29.6623	363.939
	-20	2.41143	30.5739	35.9212	25.4126	75.3401	9.02671	42.1825	436.662
	-10	2.77826	43.0726	44.6542	34.7287	93.8619	13.9098	59.6292	510.924
	0	5.4536	59.4678	55.1962	44.8471	122.789	21.5519	75.8716	586.973
	10	7.83741	78.828	68.4659	55.1915	157.717	28.9965	100.237	662.334
	20	12.5182	103.331	79.9819	65.3407	195.689	35.0898	119.685	735.323
	30	12.7647	128.821	93.0075	78.6769	245.858	46.6469	147.921	806.882
	40	18.2588	148.271	105.459	91.0135	290.547	53.5613	169.674	878.281
	50	23.8868	174.797	116.591	104.31	336.013	64.2686	191.238	938.394
	60	24.1265	200.448	129.622	117.111	380.769	74.3523	218.605	978.754
	70	29.5703	224.957	142.925	130.942	410.779	80.2154	240.901	1022.51
