# Supplementary material for: A calcineurin-mediated scaling mechanism that controls a K+-leak channel to regulate morphogen and growth factor transcription
Source: eLife. 2021 Apr 8;10:e60691. doi: 10.7554/eLife.60691 (PMC8110307; doi:10.7554/eLife.60691)
Supplement: Figure 6—figure supplement 1—source data 1. [file elife-60691-fig6-figsupp1-data1.xlsx]

## Sheet: Supplemental Figure 5B-F
	WT KCNK5B	File name	6L13E-A	6L19A-A	6L19B-A	6L19B-A	6L19B-A	6L19J-A	7B14A-A	7B14B-A	7B14L-A	7B16A-A	7B16A-A	7B16B-A	7B16B-A	7B16H-A	7B16H-A
		Dish	13L-1-1	19L-1-1	19L-1-2	19L-1-2 cell two	19L-1-2 cell four	19L-1-3	14B-1-1	14B-1-2	14B-1-3	16B-1-1	16B-1-1 cell two	16B-1-2	16B-1-2 cell two	16B-1-3	16B-1-3 cell two
		Resistance S	7.951	3.4	5.098	3.918	6.95	6.065	5.946	6.813	6.244	8.304	2.554	6.574	7.662	4.069	4.777
		Cell Capacitance	18.42	17.98	12.6	20.91	19.52	18.87	18.93	21.65	18.09	10.71	15.48	19.56	16.88	13.38	15.63
		Current reads
	measurement	-100	-1.50119e-10	8.85847e-13	-6.39385e-11	8.12242e-11	-1.00253e-10	-6.59917e-11	-3.51322e-10	-1.03985e-10	-1.82291e-10	-9.6751e-11	-3.98696e-10	-1.6913e-10	-1.18946e-10	-6.40134e-11	-9.60356e-11
		-90	-1.04716e-10	1.19912e-11	-5.10331e-11	1.02707e-10	-4.9406e-11	-5.48063e-11	-1.84613e-10	-7.16245e-11	-1.42714e-10	-8.09323e-11	-3.36862e-10	-1.52753e-10	-9.88585e-11	-2.07154e-11	-7.10718e-11
		-80	-2.6188e-11	3.68698e-11	-1.45455e-11	1.34385e-10	2.33858e-11	-3.92588e-11	5.64824e-11	-6.64773e-12	-9.4109e-11	-6.73709e-11	-2.13314e-10	-1.17206e-10	-7.75439e-11	5.12577e-11	-3.38404e-11
		-70	7.57231e-11	7.88404e-11	6.54752e-11	1.75772e-10	1.26759e-10	-1.73063e-11	3.75393e-10	7.94551e-11	-1.58988e-11	-4.9703e-11	-2.625e-11	-6.76653e-11	-4.79081e-11	1.45276e-10	2.10098e-11
		-60	2.30093e-10	1.25927e-10	2.04254e-10	2.318e-10	2.88314e-10	1.61983e-11	7.84607e-10	1.87092e-10	1.01552e-10	-2.71384e-11	2.19527e-10	-8.29029e-13	-8.22572e-12	2.68143e-10	1.02198e-10
		-50	4.75077e-10	1.93786e-10	3.82934e-10	3.21152e-10	4.97128e-10	7.19835e-11	1.24867e-09	3.56996e-10	2.72348e-10	1.02273e-12	5.49788e-10	1.01278e-10	5.23192e-11	4.21428e-10	2.07505e-10
		-40	7.95971e-10	2.69602e-10	6.66632e-10	4.24344e-10	7.88729e-10	1.18936e-10	1.77291e-09	5.74215e-10	4.91371e-10	4.00258e-11	9.16402e-10	2.24982e-10	1.25553e-10	6.24507e-10	3.58257e-10
		-30	1.21184e-09	4.18399e-10	1.00432e-09	5.80235e-10	1.15738e-09	2.13293e-10	2.33642e-09	8.97676e-10	7.94192e-10	9.54081e-11	1.3742e-09	3.70049e-10	2.14791e-10	8.98378e-10	5.58081e-10
		-20	1.77599e-09	5.99876e-10	1.37055e-09	7.75163e-10	1.6483e-09	3.30597e-10	2.96303e-09	1.22279e-09	1.1638e-09	1.59641e-10	1.91832e-09	5.88487e-10	3.37709e-10	1.18439e-09	8.34538e-10
		-10	2.3826e-09	8.20612e-10	1.7893e-09	9.87761e-10	2.252e-09	4.76849e-10	3.52923e-09	1.72529e-09	1.65281e-09	2.25842e-10	2.54869e-09	8.23755e-10	4.95256e-10	1.48195e-09	1.12423e-09
		0	3.16441e-09	1.11979e-09	2.25429e-09	1.24136e-09	2.89106e-09	6.45346e-10	4.3077e-09	2.2809e-09	2.19673e-09	3.339e-10	3.313e-09	1.10919e-09	6.46834e-10	1.93024e-09	1.47358e-09
		10	4.11324e-09	1.39816e-09	2.77014e-09	1.49613e-09	3.68545e-09	9.39065e-10	4.96554e-09	2.88814e-09	2.78464e-09	4.50129e-10	4.11338e-09	1.43807e-09	8.31637e-10	2.52404e-09	2.05751e-09
		20	4.92783e-09	1.82904e-09	2.97748e-09	1.88191e-09	4.40508e-09	1.24178e-09	6.16542e-09	3.75638e-09	3.42179e-09	6.25721e-10	4.88488e-09	1.76295e-09	1.0523e-09	3.44968e-09	2.58673e-09
		30	5.90503e-09	2.09542e-09	3.33356e-09	2.27176e-09	5.24669e-09	1.62428e-09	7.52935e-09	4.71518e-09	4.14123e-09	7.08215e-10	5.77744e-09	2.12017e-09	1.28543e-09	4.03068e-09	3.19843e-09
		40	6.76231e-09	2.81016e-09	3.66073e-09	2.64934e-09	5.97186e-09	2.10879e-09	8.80897e-09	5.52964e-09	4.85971e-09	9.51423e-10	6.76425e-09	2.49772e-09	1.5541e-09	5.23213e-09	3.78546e-09
		50	7.69842e-09	3.41112e-09	3.92857e-09	3.02202e-09	6.47511e-09	2.43669e-09	1.05264e-08	6.63815e-09	5.58751e-09	1.13735e-09	7.83324e-09	2.70792e-09	1.67727e-09	6.07549e-09	4.38768e-09
		60	8.58678e-09	3.86055e-09	4.23131e-09	3.71627e-09	7.12498e-09	2.87485e-09	1.26836e-08	7.47802e-09	6.21986e-09	1.23889e-09	8.94303e-09	2.85385e-09	1.7663e-09	6.92841e-09	4.89678e-09
	standardized	-100	-8.14978	0.0492685	-5.07448	3.88447	-5.13591	-3.49718	-18.559	-4.803	-10.0769	-9.03371	-25.7556	-8.64673	-7.04656	-4.78426	-6.14431
	to Cell Capacitance	-90	-5.68491	0.666919	-4.05025	4.91186	-2.53105	-2.90441	-9.7524	-3.30829	-7.88911	-7.5567	-21.7611	-7.80946	-5.85655	-1.54824	-4.54714
	x 1000000000000	-80	-1.42172	2.0506	-1.1544	6.42683	1.19804	-2.08049	2.98375	-0.307055	-5.20227	-6.29047	-13.78	-5.99213	-4.59383	3.83092	-2.16509
		-70	4.11092	4.38489	5.19644	8.40612	6.4938	-0.917133	19.8306	3.66998	-0.878872	-4.6408	-1.69574	-3.45937	-2.83816	10.8577	1.3442
		-60	12.4915	7.00373	16.2106	11.0856	14.7702	0.858415	41.4478	8.64166	5.61371	-2.53393	14.1813	-0.0423839	-0.487306	20.0406	6.53858
		-50	25.7914	10.7779	30.3916	15.3588	25.4676	3.81471	65.9625	16.4894	15.0552	0.095493	35.516	5.17781	3.09948	31.4969	13.2761
		-40	43.2123	14.9945	52.9073	20.2938	40.4062	6.30291	93.6561	26.5226	27.1626	3.73724	59.1991	11.5021	7.43797	46.6747	22.9211
		-30	65.7894	23.2702	79.7079	27.7492	59.292	11.3033	123.424	41.4631	43.9023	8.90832	88.7726	18.9187	12.7246	67.1433	35.7058
		-20	96.4164	33.3635	108.774	37.0714	84.4416	17.5197	156.526	56.4799	64.3339	14.9058	123.922	30.0862	20.0065	88.5194	53.3933
		-10	129.349	45.6403	142.008	47.2387	115.369	25.2702	186.436	79.6901	91.3659	21.087	164.644	42.1143	29.3398	110.759	71.9277
		0	171.792	62.2798	178.912	59.3668	148.108	34.1996	227.559	105.353	121.433	31.1765	214.018	56.7071	38.3195	144.263	94.279
		10	223.303	77.762	219.852	71.5509	188.804	49.765	262.311	133.401	153.933	42.0289	265.722	73.521	49.2676	188.643	131.639
		20	267.526	101.726	236.308	90.0005	225.67	65.8071	325.696	173.505	189.154	58.424	315.561	90.1304	62.34	257.824	165.498
		30	320.577	116.542	264.568	108.645	268.785	86.0774	397.747	217.791	228.924	66.1265	373.22	108.393	76.1511	301.247	204.634
		40	367.118	156.294	290.534	126.702	305.935	111.754	465.344	255.411	268.641	88.835	436.967	127.695	92.0675	391.041	242.192
		50	417.938	189.717	311.791	144.525	331.717	129.13	556.07	306.612	308.873	106.195	506.023	138.442	99.3643	454.072	280.722
		60	466.166	214.714	335.818	177.727	365.009	152.35	670.026	345.405	343.829	115.676	577.715	145.902	104.639	517.818	313.294
		70	518.843	267.834	355.637	204.81	375.931	191.063	722.124	372.505	375.428	137.144	644.594	146.13	121.022	577.732	350.17
	kcnk5bS332E	File name	6L13F-A	6L19E-A	6L19L-A	7B14E-A	7B14E-A	7B14F-A	7B16E-A	7B16F-A	7B16F-A	7B16F-A	6L13F-A
		Dish	13L-2-1	19L-2-1	19L-2-2	14B-2-1	14B-2-1 cell two	14B-2-2	16B-2-1	16B-2-2	16B-2-2 cell two	16B-2-2 cell three	13L-2-1 cell two
		Rs	7.294	4.735	3.896	4.436	4.052	5.135	6.547	4.703	3.433	6.276	6.766
		Ccell	20.82	21.15	21.03	21.17	20.28	16.58	34.46	16.49	23.75	16.5	17.48
		Current reads
	measurement	-100	-6.08652e-11	-1.00715e-10	7.92924e-11	-1.66018e-10	-1.12701e-10	-1.21077e-10	-3.14837e-10	9.44396e-11	-1.24959e-10	-1.193e-10	-6.74432e-11
		-90	-3.99251e-11	-7.18621e-11	9.09917e-11	-1.30826e-10	-9.83678e-11	-1.07433e-10	-2.71803e-10	1.06108e-10	-7.50077e-11	-9.25284e-11	-4.63301e-11
		-80	-3.7345e-12	-2.97133e-11	1.10336e-10	-6.39721e-11	-7.90651e-11	-5.78926e-11	-1.7883e-10	1.30886e-10	6.59607e-12	-5.11983e-11	-1.21178e-11
		-70	6.16555e-11	3.27996e-11	1.31927e-10	4.80475e-11	-5.06973e-11	2.86674e-12	-3.5483e-11	1.48988e-10	1.27288e-10	4.89411e-12	4.27273e-11
		-60	1.41539e-10	1.19737e-10	1.70651e-10	2.23378e-10	-1.07645e-11	7.86183e-11	1.71916e-10	1.82794e-10	3.01645e-10	8.0452e-11	1.32045e-10
		-50	2.67567e-10	2.379e-10	2.27588e-10	4.75377e-10	4.80553e-11	2.19184e-10	4.34122e-10	2.32317e-10	5.42732e-10	1.8431e-10	2.63122e-10
		-40	4.52983e-10	4.37797e-10	3.11214e-10	8.34427e-10	1.25302e-10	3.94143e-10	7.63621e-10	2.82585e-10	8.71751e-10	3.35201e-10	4.1663e-10
		-30	6.77022e-10	7.16513e-10	4.35121e-10	1.41217e-09	2.51317e-10	6.18438e-10	1.18289e-09	3.7696e-10	1.2485e-09	5.26258e-10	7.14434e-10
		-20	9.92844e-10	1.13164e-09	5.89163e-10	2.05692e-09	4.04783e-10	9.9875e-10	1.54684e-09	4.97751e-10	1.70525e-09	7.98644e-10	1.0517e-09
		-10	1.36671e-09	1.61787e-09	8.1634e-10	2.95056e-09	6.66834e-10	1.38522e-09	1.9131e-09	6.05824e-10	2.30008e-09	1.0855e-09	1.51362e-09
		0	1.82972e-09	2.26459e-09	1.02172e-09	3.9594e-09	8.92823e-10	1.99583e-09	2.27637e-09	7.96142e-10	2.94331e-09	1.4824e-09	2.0554e-09
		10	2.51481e-09	3.08864e-09	1.3078e-09	5.0979e-09	1.29133e-09	2.63503e-09	2.70121e-09	9.73497e-10	3.59513e-09	1.88541e-09	2.71433e-09
		20	3.27581e-09	3.90067e-09	1.54885e-09	6.62893e-09	1.6254e-09	3.42829e-09	3.14758e-09	1.17487e-09	4.38464e-09	2.41216e-09	3.65351e-09
		30	3.91678e-09	5.0108e-09	1.8342e-09	8.15933e-09	2.2618e-09	4.26023e-09	3.61778e-09	1.37757e-09	5.23587e-09	3.0262e-09	4.46136e-09
		40	4.8148e-09	6.33014e-09	2.18556e-09	9.78157e-09	2.8118e-09	4.8961e-09	4.05488e-09	1.62479e-09	6.05673e-09	3.57279e-09	5.61093e-09
		50	5.78683e-09	7.58184e-09	2.45869e-09	1.13606e-08	3.38579e-09	6.02461e-09	4.46018e-09	1.90062e-09	6.93842e-09	4.15739e-09	6.68965e-09
		60	6.60973e-09	8.42926e-09	3.05033e-09	1.29721e-08	4.04349e-09	6.8167e-09	4.87644e-09	2.11925e-09	7.90472e-09	4.62382e-09	7.9562e-09
		70	7.36049e-09	9.93279e-09	3.2711e-09	1.40597e-08	4.64147e-09	7.67121e-09	5.22768e-09	2.35182e-09	8.7679e-09	5.08738e-09	8.61632e-09
	to Cell Capacitance	-100	-2.9234	-4.76194	3.77044	-7.84214	-5.55725	-7.30259	-9.1363	5.72708	-5.26143	-7.2303	-3.85831
	x 1000000000000	-90	-1.91763	-3.39774	4.32676	-6.17978	-4.85048	-6.47967	-7.88749	6.43469	-3.15822	-5.60778	-2.65046
		-80	-0.179371	-1.40488	5.2466	-3.02183	-3.89867	-3.49171	-5.1895	7.9373	0.277729	-3.10293	-0.693238
		-70	2.96136	1.55081	6.27328	2.2696	-2.49987	0.172903	-1.02969	9.03505	5.35949	0.296613	2.44435
		-60	6.79822	5.66132	8.11465	10.5516	-0.530794	4.74176	4.98886	11.0851	12.7008	4.87588	7.55406
		-50	12.8514	11.2482	10.8221	22.4552	2.36959	13.2198	12.5979	14.0884	22.8519	11.1703	15.0527
		-40	21.7571	20.6996	14.7986	39.4155	6.1786	23.7722	22.1596	17.1367	36.7053	20.3152	23.8347
		-30	32.5179	33.8777	20.6905	66.7062	12.3924	37.3002	34.3265	22.8599	52.5684	31.8944	40.8715
		-20	47.687	53.5054	28.0154	97.162	19.9597	60.2382	44.888	30.185	71.8	48.4027	60.1659
		-10	65.6441	76.495	38.8179	139.375	32.8814	83.5476	55.5165	36.7389	96.8455	65.7879	86.5915
		0	87.8828	107.073	48.5839	187.029	44.0248	120.376	66.0583	48.2803	123.929	89.8424	117.586
		10	120.788	146.035	62.1874	240.808	63.675	158.928	78.3868	59.0356	151.374	114.267	155.282
		20	157.34	184.429	73.6495	313.128	80.1479	206.773	91.3401	71.2474	184.616	146.192	209.011
		30	188.126	236.917	87.2183	385.419	111.529	256.95	104.985	83.5397	220.458	183.406	255.227
		40	231.258	299.297	103.926	462.049	138.649	295.302	117.669	98.5318	255.02	216.533	320.991
		50	277.946	358.479	116.913	536.637	166.952	363.366	129.431	115.259	292.144	251.963	382.703
		60	317.47	398.547	145.047	612.759	199.383	411.14	141.51	128.517	332.83	280.232	455.16
		70	353.53	469.635	155.544	664.133	228.869	462.679	151.703	142.621	369.175	308.326	492.924
	kcnk5bS332A	File name	6L13G-A	6L19F-A	6L19F-A	7B14G-A	7B14G-A	7B14G-A	7B16G-A
		Dish	13L-3-1	19L-3-1	19L-3-1 cell two	14B-3-1	14B-3-1 cell two	14B-3-1 cell three	16B-3-1
		Rs	5.932	7.861	6.627	5.141	4.907	5.729	3.523
		Ccell	19.72	17.35	17.92	11.4	9.576	15.64	23.32
		Current reads
	measurement	-100	-5.18595e-11	-3.69267e-11	-3.90522e-11	-1.03324e-10	-1.54434e-10	-1.05762e-10	-1.24465e-10
		-90	-4.43518e-11	-3.10253e-11	-2.94241e-11	-7.56586e-11	-1.33662e-10	-7.68027e-11	-9.15625e-11
		-80	-3.53125e-11	-2.09272e-11	-2.20894e-11	-5.46565e-11	-1.01366e-10	-2.42872e-11	-5.29726e-11
		-70	-2.62784e-11	-5.32541e-12	-1.17459e-11	-2.31482e-11	-5.65754e-11	5.58652e-11	-2.35279e-12
		-60	-1.66193e-11	1.43259e-11	5.43647e-12	1.95635e-11	-2.76343e-12	1.72373e-10	6.90057e-11
		-50	-1.97831e-12	5.53435e-11	3.18673e-11	8.28822e-11	9.09039e-11	3.39533e-10	1.56761e-10
		-40	2.73967e-11	1.08004e-10	7.01679e-11	1.82363e-10	1.91018e-10	5.7976e-10	2.82903e-10
		-30	6.4189e-11	1.94757e-10	1.33169e-10	3.13474e-10	3.55225e-10	9.47342e-10	4.22239e-10
		-20	1.17952e-10	2.97358e-10	2.04675e-10	4.98693e-10	5.4499e-10	1.39363e-09	6.80452e-10
		-10	1.89564e-10	4.39026e-10	3.12823e-10	7.457e-10	7.45465e-10	2.01889e-09	9.47435e-10
		0	2.64241e-10	6.53796e-10	4.44491e-10	1.02747e-09	1.10428e-09	2.7468e-09	1.24923e-09
		10	3.74396e-10	9.18727e-10	6.18507e-10	1.43107e-09	1.50976e-09	3.64275e-09	1.63615e-09
		20	5.26674e-10	1.21271e-09	7.64323e-10	1.77823e-09	1.85732e-09	4.59825e-09	2.02526e-09
		30	7.22185e-10	1.61258e-09	1.15119e-09	2.36116e-09	2.44081e-09	5.60292e-09	2.47982e-09
		40	8.85243e-10	2.04116e-09	1.37491e-09	2.82018e-09	2.91475e-09	6.7824e-09	2.94513e-09
		50	1.04349e-09	2.52753e-09	1.74197e-09	3.49005e-09	3.44638e-09	7.90474e-09	3.53349e-09
		60	1.22353e-09	3.08619e-09	2.06489e-09	4.04029e-09	3.82613e-09	9.10575e-09	4.05088e-09
		70	1.52714e-09	3.62709e-09	2.389e-09	4.5237e-09	4.35791e-09	1.0199e-08	4.57679e-09
	to Cell Capacitance	-100	-2.62979	-2.12834	-2.17925	-9.06351	-16.1272	-6.76228	-5.33726
	x 1000000000000	-90	-2.24908	-1.7882	-1.64197	-6.63672	-13.958	-4.91066	-3.92635
		-80	-1.79069	-1.20618	-1.23267	-4.79443	-10.5854	-1.55289	-2.27155
		-70	-1.33258	-0.30694	-0.655463	-2.03054	-5.90804	3.57194	-0.100892
		-60	-0.842764	0.8257	0.303374	1.7161	-0.288579	11.0213	2.95908
		-50	-0.10032	3.18983	1.77831	7.27037	9.49289	21.7093	6.72217
		-40	1.38928	6.22501	3.91562	15.9968	19.9476	37.0691	12.1313
		-30	3.25502	11.2252	7.43131	27.4977	37.0953	60.5717	18.1063
		-20	5.98134	17.1388	11.4216	43.745	56.9121	89.1068	29.1789
		-10	9.61278	25.3041	17.4566	65.4123	77.8472	129.085	40.6276
		0	13.3996	37.6828	24.8042	90.1289	115.317	175.627	53.569
		10	18.9856	52.9526	34.5149	125.532	157.661	232.912	70.1608
		20	26.7076	69.8968	42.652	155.985	193.956	294.006	86.8465
		30	36.622	92.9441	64.2405	207.119	254.888	358.243	106.339
		40	44.8906	117.646	76.7249	247.384	304.381	433.657	126.292
		50	52.9153	145.679	97.2081	306.145	359.898	505.418	151.522
		60	62.0451	177.878	115.228	354.411	399.554	582.209	173.708
		70	77.4412	209.054	133.315	396.816	455.087	652.11	196.26
	kcnk5bS332E + CaN	File name	6L13H-A	6L13H-A	6L19G-A	6L19G-A	7B14I-A	7B14I-A	7B14I-A	7B14N-A	7B16C-A	7B16C-A	7B16C-A	7B16D-A	7B16I-A	7B16I-A
		Dish	13L-4-1	13L-4-1 cell two	19L-4-1	19L-4-1 cell two	14B-4-1	14B-4-1 cell two	14B-4-1 cell three	14B-4-3	16B-4-1	16B-4-1 cell two	16B-4-1 cell three	16B-4-2	16B-4-3	16B-4-3 cell two
		Rs	6.96	6.775	3.728	4.824	6.794	5.13	4.962	5.552	4.038	5.597	5.013	4.902	5.066	3.664
		Ccell	16.34	11.37	23.94	24.7	12.27	15.17	18.28	23.71	23.62	28.03	20.2	18.04	21.87	27.18
		Current reads
	measurement	-100	-4.38972e-11	-4.27066e-11	-2.63084e-10	-5.77893e-11	-6.63197e-11	-1.99638e-10	-1.37637e-10	-1.1843e-10	-2.6851e-10	-1.90643e-10	-2.02149e-10	-2.78048e-11	-7.8936e-11	-2.72247e-10
		-90	-3.51705e-11	-3.10692e-11	-2.05855e-10	-6.04675e-11	-6.02867e-11	-1.63414e-10	-1.12645e-10	-9.0204e-11	-2.26402e-10	-1.66932e-10	-1.78032e-10	-1.33471e-11	-6.85408e-11	-1.85496e-10
		-80	-2.5452e-11	-1.63688e-11	-1.42159e-10	-4.05217e-11	-5.37009e-11	-1.0564e-10	-5.98838e-11	-6.69137e-11	-1.43613e-10	-1.36185e-10	-1.51364e-10	-7.63688e-12	-5.8843e-11	-1.49148e-10
		-70	-1.09194e-11	1.08084e-11	-1.15829e-10	-1.14618e-11	-4.90444e-11	-2.078e-11	7.18233e-12	-5.36958e-11	-7.65548e-11	-8.14799e-11	-1.10808e-10	7.15651e-12	-4.82903e-11	-1.32495e-10
		-60	1.56173e-11	5.63404e-11	-4.33368e-11	4.21178e-11	-4.21798e-11	1.13396e-10	1.10971e-10	-4.27712e-11	-4.27505e-11	1.04907e-11	-5.35486e-11	2.79055e-11	-3.40057e-11	-1.05307e-10
		-50	4.93776e-11	1.17299e-10	9.20196e-12	1.21973e-10	-3.59892e-11	3.09796e-10	2.66663e-10	-3.16529e-11	-1.88197e-11	1.49073e-10	3.16555e-11	4.90212e-11	-1.92924e-11	-9.93156e-11
		-40	1.08515e-10	2.13802e-10	8.65548e-11	2.23698e-10	-2.8001e-11	5.98587e-10	4.87332e-10	-1.1454e-11	1.65444e-11	3.45873e-10	1.28559e-10	7.27944e-11	6.92149e-12	-7.95816e-11
		-30	1.75426e-10	3.48701e-10	2.03851e-10	3.69202e-10	-1.79468e-11	9.30152e-10	7.94034e-10	9.32076e-12	5.39385e-11	6.19476e-10	3.05963e-10	1.08518e-10	3.93595e-11	-5.40548e-11
		-20	3.02549e-10	5.2766e-10	3.86612e-10	5.92322e-10	-1.55217e-11	1.39597e-09	1.23714e-09	3.67949e-11	1.15266e-10	1.02799e-09	4.96516e-10	1.45736e-10	7.14592e-11	-1.90987e-11
		-10	5.03933e-10	7.8343e-10	6.55744e-10	9.29979e-10	-1.83626e-12	1.97708e-09	1.69846e-09	7.55036e-11	2.12461e-10	1.51812e-09	7.57071e-10	2.21947e-10	1.48342e-10	4.047e-12
		0	6.77177e-10	1.09574e-09	8.86563e-10	1.29027e-09	2.00568e-11	2.63487e-09	2.33421e-09	1.32913e-10	3.16245e-10	2.22149e-09	1.10352e-09	2.71428e-10	1.86686e-10	3.68518e-11
		10	9.09992e-10	1.50026e-09	1.23429e-09	1.81724e-09	3.24044e-11	3.27967e-09	3.09933e-09	1.92699e-10	4.46738e-10	3.12308e-09	1.46705e-09	3.62973e-10	3.32461e-10	8.97779e-11
		20	1.28445e-09	1.96791e-09	1.73873e-09	2.31358e-09	4.90212e-11	4.01147e-09	3.93584e-09	2.71539e-10	6.10426e-10	4.01567e-09	1.92032e-09	4.67216e-10	3.87477e-10	1.32916e-10
		30	1.65159e-09	2.51693e-09	2.0917e-09	2.87655e-09	4.44938e-11	4.64699e-09	4.80804e-09	3.76516e-10	8.45098e-10	5.21203e-09	2.41274e-09	5.5069e-10	5.87386e-10	1.58719e-10
		40	2.23762e-09	2.95748e-09	2.57782e-09	3.72805e-09	6.69551e-11	5.23419e-09	5.82069e-09	4.95899e-10	1.123e-09	6.32089e-09	2.97876e-09	6.20795e-10	6.69657e-10	1.93097e-10
		50	2.76134e-09	3.61856e-09	3.23213e-09	4.60416e-09	9.56818e-11	5.74347e-09	6.95388e-09	5.77988e-10	1.37715e-09	7.62335e-09	3.55197e-09	7.50209e-10	8.51955e-10	2.52505e-10
		60	3.33412e-09	4.32931e-09	3.80415e-09	5.33975e-09	1.29977e-10	6.19374e-09	7.69804e-09	7.32371e-10	1.45497e-09	8.92105e-09	4.13108e-09	9.35917e-10	1.076e-09	2.95093e-10
		70	3.80962e-09	4.75139e-09	4.17085e-09	6.1809e-09	1.60821e-10	6.53181e-09	8.45668e-09	8.83967e-10	1.87386e-09	9.77313e-09	4.67214e-09	1.02502e-09	1.09329e-09	3.04065e-10
	to Cell Capacitance	-100	-2.68649	-3.75608	-10.9893	-2.33965	-5.40503	-13.1601	-7.52938	-4.99494	-11.3679	-6.80139	-10.0074	-1.54129	-3.60933	-10.0164
	x 1000000000000	-90	-2.15242	-2.73256	-8.59879	-2.44808	-4.91334	-10.7722	-6.1622	-3.80447	-9.58518	-5.95548	-8.81347	-0.739861	-3.13401	-6.82472
		-80	-1.55765	-1.43965	-5.93814	-1.64055	-4.3766	-6.96374	-3.27592	-2.82217	-6.08014	-4.85854	-7.49327	-0.42333	-2.69058	-5.48742
		-70	-0.668262	0.950607	-4.8383	-0.46404	-3.9971	-1.36981	0.392906	-2.26469	-3.2411	-2.90688	-5.48554	0.396702	-2.20806	-4.87472
		-60	0.955771	4.95518	-1.81023	1.70517	-3.43764	7.47502	6.07062	-1.80393	-1.80993	0.374267	-2.65092	1.54687	-1.5549	-3.87443
		-50	3.02188	10.3165	0.384376	4.93818	-2.93311	20.4216	14.5877	-1.335	-0.79677	5.31834	1.5671	2.71736	-0.88214	-3.654
		-40	6.64106	18.804	3.61549	9.0566	-2.28207	39.4586	26.6593	-0.483087	0.70044	12.3394	6.36431	4.03517	0.316483	-2.92795
		-30	10.736	30.6685	8.51508	14.9474	-1.46266	61.3152	43.4373	0.393115	2.28359	22.1005	15.1467	6.01541	1.7997	-1.98877
		-20	18.5159	46.4081	16.1492	23.9806	-1.26501	92.0218	67.6772	1.55187	4.88002	36.6746	24.58	8.07849	3.26745	-0.702675
		-10	30.8405	68.9033	27.3911	37.651	-0.149654	130.328	92.9136	3.18446	8.99496	54.1605	37.4788	12.303	6.7829	0.148896
		0	41.4429	96.3712	37.0327	52.2377	1.63462	173.69	127.692	5.60578	13.3889	79.254	54.6297	15.0459	8.53617	1.35584
		10	55.6911	131.949	51.5576	73.5725	2.64095	216.194	169.548	8.12733	18.9135	111.419	72.6262	20.1205	15.2017	3.30309
		20	78.6077	173.079	72.6287	93.6672	3.99521	264.434	215.309	11.4525	25.8436	143.263	95.0653	25.8989	17.7173	4.89021
		30	101.076	221.366	87.3726	116.46	3.62623	306.328	263.022	15.8801	35.7789	185.945	119.443	30.5261	26.8581	5.83955
		40	136.941	260.113	107.678	150.933	5.45681	345.036	318.418	20.9152	47.5445	225.504	147.463	34.4121	30.6199	7.10438
		50	168.993	318.255	135.01	186.403	7.79803	378.607	380.409	24.3774	58.3044	271.971	175.84	41.5859	38.9554	9.2901
		60	204.047	380.766	158.904	216.184	10.5931	408.289	421.118	30.8887	61.5991	318.268	204.509	51.8801	49.1998	10.857
		70	233.147	417.888	174.221	250.239	13.1068	430.574	462.619	37.2825	79.3336	348.667	231.294	56.8193	49.9904	11.1871
	Kcnk5bS330E
		File name	6I05F-A	6I05G-A	6I06C-A	6I06D-A	6I06E-A
		Dish	6I05-2-1	6I05-2-2	6I06-2-1	6I06-2-2	6I06-2-3
		Rs	6.701	6.4	3.84	5.577	4.4
		Ccell	34.1	23.78	17.82	21.45	11.4
		Current reads
	measurement	-100	-6.80504e-10	-3.09199e-10	-1.1524e-10	-1.3038e-10	-8.53125e-10
		-90	-5.79773e-10	-2.2679e-10	-6.82774e-11	-1.07694e-10	-8.22782e-10
		-80	-4.54189e-10	-1.25036e-10	1.65031e-12	-6.73838e-11	-6.92794e-10
		-70	-2.74215e-10	2.4907e-11	1.02988e-10	-2.89799e-11	-5.49954e-10
		-60	-8.19525e-11	2.16779e-10	2.61395e-10	1.62655e-11	-4.01488e-10
		-50	1.74083e-10	5.09525e-10	4.56327e-10	8.74716e-11	-2.29468e-10
		-40	5.2415e-10	8.79068e-10	7.61754e-10	1.93174e-10	-7.91038e-11
		-30	9.45059e-10	1.34717e-09	1.11491e-09	3.28691e-10	1.50937e-10
		-20	1.51253e-09	1.96322e-09	1.63628e-09	5.0039e-10	3.67986e-10
		-10	2.13457e-09	2.73419e-09	2.29645e-09	7.3681e-10	5.75607e-10
		0	2.89832e-09	3.57863e-09	3.04753e-09	1.05574e-09	8.97115e-10
		10	3.71053e-09	4.56308e-09	3.93927e-09	1.65322e-09	1.29341e-09
		20	4.63404e-09	5.51795e-09	4.86357e-09	2.20786e-09	1.74272e-09
		30	5.58222e-09	6.58877e-09	5.94431e-09	2.69328e-09	2.1829e-09
		40	6.64684e-09	7.72926e-09	7.15509e-09	3.22439e-09	2.67862e-09
		50	7.32953e-09	8.78248e-09	7.88467e-09	3.50221e-09	3.13267e-09
		60	8.10641e-09	9.80048e-09	8.86113e-09	3.89674e-09	3.54652e-09
		70	8.71132e-09	1.02397e-08	9.89994e-09	4.13769e-09	4.11876e-09
	standardized	-100	-19.9561	-13.0025	-6.46689	-6.07832	-74.8355
	to Cell Capacitance	-90	-17.0021	-9.53701	-3.8315	-5.0207	-72.1739
	x 1000000000000	-80	-13.3193	-5.25803	0.09261	-3.14144	-60.7714
		-70	-8.0415	1.04739	5.77935	-1.35104	-48.2416
		-60	-2.4033	9.11602	14.6686	0.758298	-35.2182
		-50	5.10507	21.4266	25.6076	4.07793	-20.1288
		-40	15.371	36.9667	42.7471	9.00578	-6.93893
		-30	27.7143	56.6514	62.5651	15.3236	13.2401
		-20	44.3557	82.5576	91.8227	23.3282	32.2795
		-10	62.5974	114.979	128.869	34.3501	50.4918
		0	84.9947	150.489	171.017	49.2186	78.6943
		10	108.813	191.887	221.059	77.0732	113.457
		20	135.896	232.042	272.928	102.931	152.87
		30	163.701	277.072	333.575	125.561	191.482
		40	194.922	325.032	401.52	150.321	234.967
		50	214.942	369.322	442.462	163.273	274.796
		60	237.725	412.131	497.258	181.666	311.098
		70	255.464	430.601	555.552	192.899	361.295
	Kcnk5bS330A
		File name	6H02M-A	6H02N-A	6H02O-A	6H03C-A	6H04A-A	6G23G-A	6G23H-A
		Dish	6H01-2-1	6H01-2-2	6H01-2-3	6H03-2-1	6H03-2-1	23-2-2a	23-2-3a
		Rs	5.946	6.804	4.698	5.682	3.168	8.628	6.785
		Ccell	24.89	19.05	24.6	20.81	27.18	18.84	22.61
		Current
		-100	-6.54261e-11	-1.32154e-10	-1.84298e-10	-8.31844e-11	-2.50803e-10	-1.06299e-10	-6.77299e-11
		-90	-3.39075e-11	-7.74923e-11	-7.50413e-11	-4.54778e-11	-2.03148e-10	-9.11389e-11	-6.61777e-11
		-80	1.43104e-11	1.10976e-11	-9.98967e-12	1.42872e-11	-1.56893e-10	-5.08884e-11	-4.16555e-11
		-70	7.8688e-11	1.22234e-10	2.46555e-10	1.02002e-10	-9.80139e-11	5.12913e-12	-1.93363e-11
		-60	1.69987e-10	2.81865e-10	6.79127e-10	2.39514e-10	-1.70635e-11	8.0656e-11	1.55914e-11
		-50	2.97557e-10	4.9132e-10	1.16421e-09	4.20651e-10	6.99509e-11	2.00119e-10	5.78667e-11
		-40	4.63572e-10	7.65374e-10	1.80006e-09	6.38711e-10	1.9101e-10	3.6625e-10	1.1681e-10
		-30	7.33184e-10	1.12559e-09	2.7224e-09	9.88608e-10	3.50103e-10	5.9312e-10	1.96204e-10
		-20	1.01523e-09	1.56493e-09	3.70381e-09	1.42181e-09	5.37311e-10	9.05726e-10	2.7742e-10
		-10	1.46527e-09	2.07663e-09	5.02711e-09	1.98804e-09	8.15925e-10	1.31062e-09	4.20457e-10
		0	1.97362e-09	2.67122e-09	6.62247e-09	2.65952e-09	1.12896e-09	1.80502e-09	5.70524e-10
		10	2.48461e-09	3.23485e-09	8.38609e-09	3.36494e-09	1.45976e-09	2.69219e-09	7.8142e-10
		20	3.33328e-09	3.9311e-09	1.04109e-08	4.32274e-09	1.82096e-09	3.62336e-09	9.41849e-10
		30	3.97547e-09	4.59329e-09	1.2243e-08	5.45073e-09	2.35883e-09	4.57455e-09	1.2213e-09
		40	4.8405e-09	5.34453e-09	1.38303e-08	6.25531e-09	2.66899e-09	5.64371e-09	1.53765e-09
		50	5.87134e-09	6.11081e-09	1.4736e-08	7.37325e-09	3.09169e-09	6.74826e-09	1.73782e-09
		60	6.45048e-09	6.38192e-09	1.57808e-08	8.36496e-09	3.42199e-09	8.21812e-09	1.94715e-09
		70	7.07498e-09	6.90673e-09	1.64421e-08	9.19705e-09	3.91103e-09	9.23019e-09	2.16509e-09
		Current
	standardized	-100	-4.87839e+11	1.71614e+12	4.59144e+12	8.39957e+11	8.6229e+12	4.00691e+12	8.92828e+11
	to Cell Capacitance	-90	-2.52826e+11	1.00631e+12	1.86951e+12	4.59214e+11	6.98446e+12	3.43546e+12	8.72366e+11
	x 1000000000000	-80	1.06703e+11	-1.44112e+11	2.48874e+11	-1.44265e+11	5.39416e+12	1.91823e+12	5.4911e+11
		-70	5.86725e+11	-1.58732e+12	-6.14245e+12	-1.02997e+12	3.36983e+12	-1.93341e+11	2.54895e+11
		-60	1.26748e+12	-3.66027e+12	-1.69192e+13	-2.4185e+12	5.86663e+11	-3.04031e+12	-2.05529e+11
		-50	2218687087105	-6.38022e+12	-2.90041e+13	-4.24754e+12	-2.40499e+12	-7.54343e+12	-7.62809e+11
		-40	3.45655e+12	-9.93906e+12	-4.48451e+13	-6.4494e+12	-6.56714e+12	-1.38057e+13	-1.53981e+12
		-30	5.46687e+12	-1.46168e+13	-6.78235e+13	-9.9825e+12	-1.20369e+13	-2.23575e+13	-2.5864e+12
		-20	7.5699e+12	-2.0322e+13	-9.22734e+13	-1.43568e+13	-1.84734e+13	-3.41411e+13	-3.657e+12
		-10	1.09256e+13	-2.69669e+13	-1.25241e+14	-2.00743e+13	-2.80524e+13	-4.94035e+13	-5.54254e+12
		0	1.4716e+13	-3.46882e+13	-1.64986e+14	-2.68546e+13	-3.8815e+13	-6.80398e+13	-7.52075e+12
		10	1.85261e+13	-4.20074e+13	-2.08924e+14	-3.39776e+13	-5.01882e+13	-1.01481e+14	-1.03008e+13
		20	2.48541e+13	-5.10488e+13	-2.59368e+14	-4.3649e+13	-6.26067e+13	-1.36582e+14	-1.24156e+13
		30	2.96425e+13	-5.96479e+13	-3.05011e+14	-5.50389e+13	-8.10993e+13	-1.72436e+14	-1.60994e+13
		40	3.60924e+13	-69403441518725	-3.44556e+14	-6.31632e+13	-9.1763e+13	-2.12738e+14	-2.02696e+13
		50	4.37787e+13	-7.93543e+13	-3.6712e+14	-7.44516e+13	-1.06296e+14	-2.54374e+14	-2.29083e+13
		60	4.8097e+13	-8.28749e+13	-3.93149e+14	-8.44655e+13	-1.17652e+14	-3.0978e+14	-2.56677e+13
		70	5.27535e+13	-8.969e+13	-4.09624e+14	-9.28675e+13	-1.34466e+14	-3.4793e+14	-2.85406e+13
	Kcnk5bS330E
		File name	6I05F-A	6I05G-A	6I06C-A	6I06D-A	6I06E-A	6I06F-A
		Dish	6I05-2-1	6I05-2-2	6I06-2-1	6I06-2-2	6I06-2-3	6I06-2-2
		Rs	6.701	6.4	3.84	5.577	4.4	5.61
		Ccell	34.1	23.78	17.82	21.45	11.4	21.35
		Current reads
		-100	-6.80504e-10	-3.09199e-10	-1.1524e-10	-1.3038e-10	-8.53125e-10	-1.2038e-10
		-90	-5.79773e-10	-2.2679e-10	-6.82774e-11	-1.07694e-10	-8.22782e-10	-1.06694e-10
		-80	-4.54189e-10	-1.25036e-10	1.65031e-12	-6.73838e-11	-6.92794e-10	-6.73838e-11
		-70	-2.74215e-10	2.4907e-11	1.02988e-10	-2.89799e-11	-5.49954e-10	-2.89799e-11
		-60	-8.19525e-11	2.16779e-10	2.61395e-10	1.62655e-11	-4.01488e-10	1.62655e-11
		-50	1.74083e-10	5.09525e-10	4.56327e-10	8.74716e-11	-2.29468e-10	8.74716e-11
		-40	5.2415e-10	8.79068e-10	7.61754e-10	1.93174e-10	-7.91038e-11	1.93174e-10
		-30	9.45059e-10	1.34717e-09	1.11491e-09	3.28691e-10	1.50937e-10	3.28691e-10
		-20	1.51253e-09	1.96322e-09	1.63628e-09	5.0039e-10	3.67986e-10	5.0039e-10
		-10	2.13457e-09	2.73419e-09	2.29645e-09	7.3681e-10	5.75607e-10	7.3681e-10
		0	2.89832e-09	3.57863e-09	3.04753e-09	1.05574e-09	8.97115e-10	1.05476e-09
		10	3.71053e-09	4.56308e-09	3.93927e-09	1.65322e-09	1.29341e-09	1.54222e-09
		20	4.63404e-09	5.51795e-09	4.86357e-09	2.20786e-09	1.74272e-09	2.20876e-09
		30	5.58222e-09	6.58877e-09	5.94431e-09	2.69328e-09	2.1829e-09	2.69328e-09
		40	6.64684e-09	7.72926e-09	7.15509e-09	3.22439e-09	2.67862e-09	3.23439e-09
		50	7.32953e-09	8.78248e-09	7.88467e-09	3.50221e-09	3.13267e-09	3.51221e-09
		60	8.10641e-09	9.80048e-09	8.86113e-09	3.89674e-09	3.54652e-09	3.79674e-09
		70	8.71132e-09	1.02397e-08	9.89994e-09	4.13769e-09	4.11876e-09	4.13469e-09
	standardized	-100	-19.9561	-13.0025	-6.46689	-6.07832	-74.8355	-6.07832
	to Cell Capacitance	-90	-17.0021	-9.53701	-3.8315	-5.0207	-72.1739	-5.0207
	x 1000000000000	-80	-13.3193	-5.25803	0.09261	-3.14144	-60.7714	-3.14144
		-70	-8.0415	1.04739	5.77935	-1.35104	-48.2416	-1.35104
		-60	-2.4033	9.11602	14.6686	0.758298	-35.2182	0.758298
		-50	5.10507	21.4266	25.6076	4.07793	-20.1288	4.07793
		-40	15.371	36.9667	42.7471	9.00578	-6.93893	9.00578
		-30	27.7143	56.6514	62.5651	15.3236	13.2401	15.3236
		-20	44.3557	82.5576	91.8227	23.3282	32.2795	23.3282
		-10	62.5974	114.979	128.869	34.3501	50.4918	34.3501
		0	84.9947	150.489	171.017	49.2186	78.6943	49.2186
		10	108.813	191.887	221.059	77.0732	113.457	77.0732
		20	135.896	232.042	272.928	102.931	152.87	102.931
		30	163.701	277.072	333.575	125.561	191.482	125.561
		40	194.922	325.032	401.52	150.321	234.967	150.321
		50	214.942	369.322	442.462	163.273	274.796	163.273
		60	237.725	412.131	497.258	181.666	311.098	181.666
		70	255.464	430.601	555.552	192.899	361.295	192.899

## Sheet: Supplemental Figure 5G
	Time	non-tg body
	pre- Amp	16780.1	16074.6	17322.8	16781.1	18571.7	14451.2	15509.6	10294.3	9735.62	10154.8	10240.1	9428.54	11718.3
	Amp	16780.1	16074.6	17322.8	16781.1	18571.7	14451.2	15509.6	10294.3	9735.62	10154.8	10240.1	9428.54	11718.3
	5	16490	16351.3	17283.7	16673.4	18297.6	14484.1	14824.5	10312	11916.4	10257.8	10474.2	9789.52	10023.5
	12	16300.3	16676.5	17624.1	16526.3	18188.5	14656.1		10095.4	11970.5	10715.2	10277.1	9807.54	10456.5
	19	16110.7	16631.9	17318.6	16487.3	18047.7	14511.4		10355.5	10343.3	10744.6	9663.33	12042.6	10331.2
	26	16251.6	16640.4		16429	18372.2	14734.9		10258.1	12216.8	10384.6	11177.3	9825.31	10221.8
	33	16056.8	16486.9		16378.5	18338.9	14511.6		10601.9	9987.99	10745.3	12296	10547.5
		kcnk5bS345 body
	pre- Amp	15694	15587.4	16508.3	15587.4	16495.2	15815.8	16207.8	10733.2	10078.3	10456.2	9523.05	9644.9	11772.2
	Amp	15694	15587.4	16508.3	15587.4	16495.2	15815.8	16207.8	10733.2	10078.3	10456.2	9523.05	9644.9	11772.2
	5	15318.4	15387.8	16509.8	15373.3	16169.7	15807	15951.3	9683.35	12150.8	9627	10095.8	10582.5	10510.2
	12	15507.3	15702.2	16419.7	15582.4	16347.2	15848.4	16116.7	9644.95	11956.1	10131.9	10618.4	10762.7	9771.07
	19	15326.8	15515	16415.6	15259.7	16272	15727.8	16235.8	9430.63	9626.87	10583.1	10528.6	11718.1	9951.35
	26	15314.5	15503.8	16534.6	15297.1	17115	15900.1	16259	11862.4	10475.7	9573.6	9608.82	10024.5	10640.3
	33	15346.2	15956.2	16585.9	15195		15990.2	16114.6	9608.89	11756.5	9737.04	10640.8	10077.7	10585.8
		kcnk5bS345A body
	pre- Amp	17711.2	19010	16087.3	18873.5	16667.6	17716.2	18186.3	12006.6	11650.5	10546.3	11574.1	10348	10367.6
	Amp	17711.2	19010	16087.3	18873.5	16667.6	17716.2	18186.3	12006.6	11650.5	10546.3	11574.1	10348	10367.6
	5	18865.9	16490.9	17855.3	18092.2				11772.5	10708.7	11862.4	12187.5	10511.2	die
	12	18930.4	16572	17851.1	18296.4				11682.7	11502.9	10384.8	10585.3	12189.4	die
	19	18694.1	16559.3	17500.2	17934.9	19627.9	19026.9	18838.3	10492.4	12114.8	11376.7	11664.1	10221.8	die
	26	18970.7	16481.9	17799.7	18556.8	19629.7	19287.8	18771.7	11748.6	11537.8	11953.1	10330
	33	18599.7	16587.9	17639.7	18019.9	19705.3	19346	18802.1	11465.7	11596.4	12060.6
		kcnk5bS345E
	pre- Amp	17500.2	16601.1	18005.5	17803.2	16378.5	16570.7	9749.61	10924.9	10149.9	11664.5	11141.7	10997
	Amp	17500.2	16601.1	18005.5	17803.2	16378.5	16570.7	9749.61	10924.9	10149.9	11664.5	11141.7	10997
	5	17599.5	16090.1	18189.3	17292.6	16403.4	16590.2	11627.9	10312	9971.01	10817.4	11285.5	11285.9
	12	17517.4	16523.7	18080.7	17631	16350.8	16423.6	11105.5	9953.33	11123.4	11592.4	10726.6	10295.5
	19	17528.6	16415.3	18070	17216.5	16311.9	16350.2	10637.9	11177.8	11393.8	10780.6	9843.2
	26	17626	16619.2		17358.9	16280.3	16451.8	10853	10942.9	9879.31	11629.1	10927.8
	33	17392.3	16573.9		17652.2	16125.7	16421.4	10853	10926.3	9951.37	11141.2	11520.9
