# Supplementary material for: A calcineurin-mediated scaling mechanism that controls a K+-leak channel to regulate morphogen and growth factor transcription
Source: eLife. 2021 Apr 8;10:e60691. doi: 10.7554/eLife.60691 (PMC8110307; doi:10.7554/eLife.60691)
Supplement: Figure 6—source data 1. [file elife-60691-fig6-data1.xlsx]

## Sheet:  Fig 6B
Kcnk5bS345
	File name	6H12A-A	6H12B-A	6H12C-A	6H17A-A	6H17B-A	6H17D-A	6H18E-A	6H18F-A	6H18G-A	6H01C-A	6H01D-A	6H02C-A	6H02D-A	6H02F-A	6H03A-A	6H03B-A	6G23C-A	6G23E-A	6G23Q-A	6G23R-A
	Dish	6H12-1-1	6H12-1-2	6H12-1-3	6H17-1-1	6H17-1-2	6H17-1-4	6H18-1-1	6H18-1-2	6H18-1-3	6H01-1-1	6H01-1-2	6H02-1-1	6H02-1-2	6H02-1-4	6H03-1-1	6H03-1-2	6G23-1-3	6G23-1-5	6G23-1-6	6G23-1-7
	Rs	5.702	5.502	6.023	3.4	6.618	6.747	7.346	5.996	5.3	4.902	4.708	4.833	4.68	4.902	5.629	5.502	3.898	8.437	8.583	3.59
	Ccell	36.81	25.11	23.05	20.6	17.74	20.01	15.61	14.59	12.6	24.7	14.75	17.56	27.86	11.6	15	25	13.2	17.78	16.26	17.5
	Current reads
measured	-100	-2.15134e-09	-1.32965e-10	-6.67949e-11	-4.19995e-10	1.95659e-10	1.95659e-10	-6.1005e-11	-1.57226e-10	-3.75721e-10	-1.17188e-09	-1.02665e-10	-2.69228e-10	-1.41175e-10	1.37707e-11	-1.18946e-10	-1.61043e-10	-1.73936e-10	-3.39734e-10	-8.51059e-11	-1.1694e-10
	-90	-4.0585e-10	-3.06302e-11	-4.41813e-11	-2.28926e-10	2.07206e-10	2.07206e-10	-4.37133e-11	-2.71952e-11	-1.11265e-10	-7.12151e-10	-5.1782e-11	-2.03223e-10	-7.52557e-11	8.2048e-11	-4.87862e-11	-4.28771e-11	-5.78512e-11	-3.02709e-10	-5.95403e-11	-9.58729e-11
	-80	2.08312e-09	1.10207e-10	-1.10718e-11	4.84401e-11	2.21981e-10	2.21981e-10	-2.08546e-11	1.59244e-10	1.69066e-10	-5.02583e-11	1.92355e-11	-1.28115e-10	1.33032e-11	1.96862e-10	5.81457e-11	1.48549e-10	1.13822e-10	-2.48391e-10	-4.80579e-11	-6.32206e-11
	-70	5.48826e-09	3.09267e-10	2.39618e-11	4.27221e-10	2.41111e-10	2.41111e-10	1.9811e-12	4.19661e-10	4.22226e-10	8.60718e-10	1.11973e-10	-1.45584e-11	1.32144e-10	3.48045e-10	2.16808e-10	4.50496e-10	3.65522e-10	-1.9868e-10	-1.85563e-11	-2.05398e-11
	-60	9.64713e-09	5.99385e-10	8.42123e-11	9.2017e-10	2.69114e-10	2.69114e-10	3.54687e-11	7.64715e-10	6.68434e-10	2.02683e-09	2.39313e-10	1.25994e-10	2.87621e-10	5.48301e-10	4.33435e-10	9.05491e-10	7.14251e-10	-1.54525e-10	1.77169e-11	3.75026e-11
	-50	1.40201e-08	9.86302e-10	1.62244e-10	1.54536e-09	3.09504e-10	3.09504e-10	8.53819e-11	1.20222e-09	9.76667e-10	3.53076e-09	3.88889e-10	3.15222e-10	4.91103e-10	7.93696e-10	7.49597e-10	1.54192e-09	1.16702e-09	-1.1297e-10	7.28745e-11	1.10307e-10
	-40	1.86202e-08	1.48776e-09	2.35695e-10	2.29914e-09	3.56315e-10	3.56315e-10	1.45091e-10	1.74019e-09	1.2232e-09	5.26417e-09	5.89576e-10	5.78592e-10	7.29117e-10	1.04847e-09	1.1346e-09	2.42121e-09	1.63519e-09	-7.63946e-11	1.60656e-10	2.15488e-10
	-30	2.23246e-08	2.17242e-09	3.6876e-10	3.1881e-09	4.08115e-10	4.08115e-10	2.09713e-10	2.40563e-09	1.50058e-09	7.34893e-09	8.38104e-10	8.95449e-10	1.03345e-09	1.35942e-09	1.69224e-09	3.64657e-09	2.3644e-09	-2.59814e-11	3.05083e-10	3.64248e-10
	-20	2.54404e-08	2.96903e-09	4.91715e-10	4.2002e-09	4.69757e-10	4.69757e-10	2.9875e-10	3.28926e-09	1.71213e-09	9.56748e-09	1.15888e-09	1.28806e-09	1.38226e-09	1.68421e-09	2.27663e-09	5.14203e-09	3.17004e-09	1.39876e-11	4.82678e-10	5.45708e-10
	-10	2.77146e-08	3.91898e-09	6.44455e-10	5.35504e-09	5.42732e-10	5.42732e-10	4.40449e-10	4.19863e-09	2.34763e-09	1.19309e-08	1.46707e-09	1.74184e-09	1.83545e-09	2.04734e-09	3.16855e-09	7.07949e-09	4.00557e-09	5.82128e-11	7.38381e-10	7.50697e-10
	0	2.96267e-08	5.07895e-09	8.12818e-10	6.56318e-09	6.40638e-10	6.40638e-10	5.357e-10	5.34358e-09	2.76961e-09	1.42664e-08	1.86842e-09	2.3137e-09	2.2395e-09	2.42056e-09	4.01051e-09	9.25887e-09	4.81504e-09	1.0593e-10	1.08934e-09	1.08052e-09
	10	3.07648e-08	6.45014e-09	1.02385e-09	7.86168e-09	7.303e-10	7.303e-10	7.1303e-10	6.73877e-09	3.24542e-09	1.65623e-08	2.32978e-09	2.80618e-09	2.7732e-09	2.91181e-09	5.15431e-09	1.15841e-08	5.83293e-09	1.44109e-10	1.54281e-09	1.51581e-09
	20	3.17506e-08	7.76452e-09	1.13631e-09	9.16131e-09	8.04347e-10	8.04347e-10	8.46067e-10	7.69052e-09	3.66719e-09	1.89126e-08	2.7781e-09	3.43746e-09	3.1006e-09	3.34251e-09	6.17067e-09	1.37516e-08	6.97419e-09	2.02818e-10	2.04931e-09	1.9595e-09
	30	3.27294e-08	9.26428e-09	1.34429e-09	1.05494e-08	9.05108e-10	9.05108e-10	9.98204e-10	9.5182e-09	4.26504e-09	2.12733e-08	3.17818e-09	3.99162e-09	3.57261e-09	3.87438e-09	7.48618e-09	1.48762e-08	7.98818e-09	2.66488e-10	2.81561e-09	2.42432e-09
	40	3.33451e-08	1.07163e-08	1.47556e-09	1.20738e-08	9.44985e-10	9.44985e-10	1.1604e-09	1.18964e-08	5.01506e-09	2.32936e-08	3.51008e-09	4.51054e-09	3.86768e-09	5.18032e-09	8.67317e-09	1.59482e-08	8.87559e-09	2.83409e-10	3.5572e-09	2.9456e-09
	50	3.34536e-08	1.2158e-08	1.5797e-09	1.3455e-08	1.02674e-09	1.02674e-09	1.32557e-09	1.37383e-08	6.28555e-09	2.50144e-08	3.89232e-09	4.81558e-09	4.09032e-09	6.72424e-09	9.89837e-09	1.70844e-08	9.83409e-09	2.85054e-10	4.59813e-09	3.47183e-09
	60	3.40399e-08	1.32142e-08	1.62721e-09	1.44645e-08	1.05737e-09	1.05737e-09	1.46712e-09	1.51734e-08	7.07881e-09	2.6647e-08	4.18746e-09	5.20716e-09	4.28329e-09	7.77874e-09	1.08429e-08	1.81727e-08	1.06458e-08	2.93396e-10	5.44105e-09	4.0504e-09
	70	3.33689e-08	1.37987e-08	1.60164e-09	1.52764e-08	1.08674e-09	1.08674e-09	1.55305e-09	1.68989e-08	8.64623e-09	2.79659e-08	4.35458e-09	5.04147e-09	4.33438e-09	8.50513e-09	1.22323e-08	1.91558e-08	1.15604e-08	2.91968e-10	6.6094e-09	4.29037e-09
	Current
standardized	-100	-58.4444	-5.2953	-2.89783	-20.3881	11.0293	9.77806	-3.90807	-10.7763	-29.8191	-47.4445	-6.96034	-15.3319	-5.0673	1.18713	-7.92973	-6.44172	-13.177	-19.1076	-5.23407	-6.68229
to Cell Capacitance	-90	-11.0255	-1.21984	-1.91676	-11.1129	11.6802	10.3551	-2.80034	-1.86396	-8.83056	-28.832	-3.51064	-11.5731	-2.70121	7.0731	-3.25241	-1.71508	-4.38267	-17.0253	-3.66177	-5.47845
x 1000000000000	-80	56.5911	4.38897	-0.480338	2.35146	12.513	11.0935	-1.33598	10.9146	13.4179	-2.03475	1.3041	-7.29584	0.477502	16.9709	3.87638	5.94196	8.62288	-13.9702	-2.95559	-3.61261
	-70	149.097	12.3165	1.03956	20.7389	13.5914	12.0495	0.126912	28.7636	33.51	34.8469	7.59139	-0.829066	4.74314	30.0039	14.4539	18.0198	27.6911	-11.1744	-1.14122	-1.1737
	-60	262.079	23.8704	3.65346	44.6684	15.1699	13.449	2.27218	52.4136	53.0503	82.0579	16.2246	7.17506	10.3238	47.2673	28.8957	36.2196	54.1099	-8.69094	1.0896	2.14301
	-50	380.877	39.2793	7.03879	75.0175	17.4467	15.4675	5.46969	82.4003	77.5133	142.946	26.3654	17.9511	17.6275	68.4221	49.9731	61.6768	88.4106	-6.35377	4.48183	6.30326
	-40	505.846	59.2497	10.2254	111.609	20.0854	17.8068	9.29475	119.273	97.0794	213.124	39.9713	32.9494	26.1707	90.3853	75.64	96.8484	123.878	-4.29666	9.88044	12.3136
	-30	606.482	86.5161	15.9983	154.762	23.0054	20.3956	13.4345	164.882	119.094	297.528	56.8206	50.9937	37.0944	117.191	112.816	145.863	179.121	-1.46127	18.7628	20.8142
	-20	691.127	118.241	21.3325	203.893	26.4801	23.4761	19.1384	225.446	135.883	387.347	78.5681	73.3519	49.6145	145.191	151.775	205.681	240.155	0.786704	29.685	31.1833
	-10	752.91	156.072	27.959	259.953	30.5937	27.123	28.2158	287.775	186.32	483.032	99.4624	99.1936	65.8812	176.495	211.237	283.18	303.452	3.27406	45.4109	42.897
	0	804.855	202.268	35.2633	318.601	36.1126	32.0159	34.3177	366.249	219.81	577.587	126.673	131.76	80.3841	208.669	267.367	370.355	364.776	5.95782	66.9951	61.744
	10	835.773	256.875	44.4187	381.635	41.1669	36.4968	45.6778	461.876	257.573	670.538	157.951	159.805	99.5406	251.018	343.621	463.364	441.889	8.10512	94.8838	86.6177
	20	862.554	309.22	49.2976	444.724	45.3409	40.1973	54.2003	527.109	291.047	765.692	188.346	195.755	111.292	288.147	411.378	550.064	528.348	11.4071	126.034	111.971
	30	889.144	368.948	58.3206	512.107	51.0207	45.2328	63.9464	652.378	338.495	861.267	215.47	227.313	128.234	333.998	499.079	595.048	605.165	14.9881	173.162	138.533
	40	905.871	426.774	64.0156	586.107	53.2686	47.2256	74.337	815.38	398.021	943.061	237.972	256.864	138.826	446.579	578.211	637.928	672.393	15.9398	218.77	168.32
	50	908.818	484.19	68.5336	653.155	57.8771	51.3113	84.918	941.624	498.853	1012.73	263.886	274.236	146.817	579.676	659.891	683.376	745.007	16.0323	282.788	198.39
	60	924.746	526.252	70.5948	702.16	59.6037	52.8421	93.9859	1039.99	561.81	1078.83	283.896	296.535	153.743	670.581	722.86	726.908	806.5	16.5015	334.628	231.451
	70	906.517	549.53	69.4855	741.573	61.2593	54.3098	99.4907	1158.25	686.209	1132.22	295.226	287.1	155.577	733.201	815.487	766.232	875.788	16.4211	406.482	245.164
Kcnk5bS345A
	File name	6H12H-A	6H12I-A	6H12J-A	6H01G-A	6H02H-A	6H02J-A	6H02K-A	6H02L-A	6H03F-A	6G23L-A	6G23M-A	6G23N(O)-A	6G23O(P)-A
	Dish	6H12-2-1	6H12-2-2	6H12-2-3	6H01-4-2	6H01-4-1	6H01-4-3	6H01-4-4	6H01-4-5	6H03-4-1	23-4-1a	23-4-2a	23-4-3a	23-4-3a
	Rs	5.502	7.873	5.362	4.102	5.362	6.343	7.848	6.94	5.252	7.591	7.144	7.567	7.102
	Ccell	11.6	24.61	19.29	20.29	20.33	16.9	23.09	18.25	16.89	24.7	18.08	22.76	23.3
	Current reads
	-100	1.06121e-10	-1.17443e-10	-1.03107e-10	-3.85243e-10	-3.57903e-11	-7.21643e-11	-1.12707e-10	-1.67851e-10	-4.15367e-11	-6.49819e-11	-8.30243e-11	-1.53117e-10	-2.58326e-10
	-90	1.34114e-10	-7.70067e-11	-4.01395e-11	-9.90341e-11	-2.90857e-11	-2.65289e-11	-7.586e-11	-1.30178e-10	-2.75568e-11	-5.59168e-11	-7.33523e-11	-9.68053e-11	-1.92668e-10
	-80	1.75377e-10	-3.71668e-11	3.17407e-11	3.57324e-10	-2.41916e-11	4.85486e-11	-3.77363e-10	-9.16555e-11	-5.10847e-12	-3.9437e-11	-6.38817e-11	-1.40139e-10	-1.06544e-10
	-70	2.27066e-10	1.64489e-11	1.30341e-10	9.78399e-10	-1.75362e-11	1.5687e-10	-4.27944e-11	-5.36751e-11	2.96952e-11	-1.56999e-11	-5.19809e-11	-1.07593e-10	-8.74742e-12
	-60	2.93908e-10	9.14928e-11	2.57082e-10	1.77065e-09	-9.20971e-12	3.10754e-10	1.85176e-12	-1.28848e-11	7.5625e-11	1.70532e-11	-3.36389e-11	-1.24897e-10	8.69886e-11
	-50	3.82286e-10	1.78773e-10	4.10576e-10	2.74769e-09	5.06198e-13	5.20005e-10	6.67665e-11	2.94964e-11	1.34783e-10	6.04313e-11	-1.10925e-11	-1.63962e-10	2.18102e-10
	-40	4.82978e-10	2.98399e-10	6.03001e-10	3.85501e-09	1.6343e-11	8.3516e-10	1.55369e-10	8.8329e-11	2.33221e-10	1.37317e-10	1.36389e-11	-6.99716e-11	3.42376e-10
	-30	6.00498e-10	4.3469e-10	8.98954e-10	5.07393e-09	3.45635e-11	1.24806e-09	2.61544e-10	1.5719e-10	3.58373e-10	2.28339e-10	6.54261e-11	-4.40005e-11	4.74837e-10
	-20	7.37461e-10	5.96785e-10	1.20782e-09	6.38324e-09	6.67097e-11	1.73887e-09	4.23391e-10	2.19032e-10	4.98735e-10	3.58221e-10	9.89876e-11	-3.1733e-11	6.18923e-10
	-10	8.68135e-10	8.21451e-10	1.55065e-09	7.70186e-09	7.86699e-11	2.30625e-09	5.91759e-10	3.25013e-10	7.09527e-10	5.37647e-10	1.67113e-10	-2.73838e-11	7.70046e-10
	0	1.01451e-09	1.06109e-09	1.93748e-09	9.02746e-09	1.20532e-10	3.16821e-09	7.94365e-10	4.42585e-10	9.18006e-10	7.74623e-10	2.38249e-10	-1.54752e-11	9.04499e-10
	10	1.17833e-09	1.26792e-09	2.354e-09	1.0409e-08	1.62774e-10	3.96031e-09	1.07354e-09	5.46927e-10	1.15773e-09	1.09847e-09	3.4961e-10	-1.04597e-11	1.04798e-09
	20	1.33189e-09	1.54387e-09	2.78553e-09	1.15475e-08	1.96991e-10	5.02162e-09	1.27261e-09	6.81219e-10	1.50144e-09	1.45053e-09	4.81596e-10	-2.13843e-12	1.17269e-09
	30	1.50332e-09	1.82752e-09	3.10278e-09	1.26521e-08	2.22464e-10	6.26044e-09	1.5954e-09	7.382e-10	1.75205e-09	1.82994e-09	5.36557e-10	6.79752e-12	1.29994e-09
	40	1.69502e-09	1.98284e-09	3.29301e-09	1.34812e-08	2.71196e-10	7.36383e-09	1.9749e-09	8.70749e-10	2.17366e-09	2.31177e-09	6.98753e-10	2.95894e-11	1.44118e-09
	50	1.88575e-09	2.2421e-09	3.4614e-09	1.41639e-08	2.86697e-10	8.46147e-09	2.38497e-09	1.00741e-09	2.49269e-09	2.83203e-09	8.21235e-10	2.38326e-11	1.4895e-09
	60	2.04896e-09	2.28517e-09	3.6741e-09	1.47535e-08	3.40416e-10	9.74762e-09	2.55783e-09	1.0858e-09	2.63655e-09	3.47338e-09	9.28378e-10	7.13326e-11	1.56314e-09
	70	2.22791e-09	2.34399e-09	3.54071e-09	1.51907e-08	3.47849e-10	1.09475e-08	2.82681e-09	1.07696e-09	2.97312e-09	4.17566e-09	1.1429e-09	8.2265e-11	1.61025e-09
	Current
standardized	-100	9.14836	-4.77217	-5.3451	-18.9868	-1.76047	-4.27008	-4.8812	-9.19732	-2.45925	-2.63085	-4.59205	-6.72746	-11.087
to Cell Capacitance	-90	11.5616	-3.12908	-2.08084	-4.88093	-1.43068	-1.56976	-3.2854	-7.13304	-1.63155	-2.26384	-4.0571	-4.25331	-8.26901
x 1000000000000	-80	15.1187	-1.51023	1.64545	17.6108	-1.18995	2.8727	-16.3431	-5.02222	-0.302455	-1.59664	-3.53328	-6.15725	-4.5727
	-70	19.5747	0.668383	6.75692	48.2207	-0.862577	9.28225	-1.85337	-2.9411	1.75815	-0.635623	-2.87505	-4.72728	-0.375426
	-60	25.3369	3.71771	13.3272	87.2671	-0.453011	18.3878	0.0801975	-0.706016	4.4775	0.690413	-1.86056	-5.48757	3.73342
	-50	32.9557	7.26424	21.2844	135.421	0.0248991	30.7695	2.89158	1.61624	7.98005	2.44661	-0.613523	-7.20395	9.3606
	-40	41.636	12.1251	31.2598	189.996	0.803886	49.4178	6.72884	4.83995	13.8082	5.55939	0.754364	-3.07432	14.6942
	-30	51.7671	17.6631	46.6021	250.07	1.70012	73.8497	11.3272	8.61315	21.2181	9.24449	3.6187	-1.93324	20.3793
	-20	63.5742	24.2497	62.6138	314.6	3.28134	102.892	18.3366	12.0018	29.5284	14.5029	5.47498	-1.39424	26.5632
	-10	74.8392	33.3787	80.3862	379.589	3.86965	136.464	25.6284	17.8089	42.0087	21.7671	9.24298	-1.20315	33.0492
	0	87.4578	43.1162	100.44	444.922	5.92878	187.468	34.403	24.2512	54.352	31.3613	13.1775	-0.67993	38.8197
	10	101.58	51.5205	122.032	513.011	8.00659	234.338	46.4937	29.9686	68.5453	44.4725	19.3368	-0.459565	44.9777
	20	114.818	62.7334	144.403	569.123	9.68967	297.137	55.1152	37.3271	88.8952	58.7259	26.6369	-0.0939556	50.33
	30	129.597	74.2592	160.849	623.563	10.9426	370.44	69.0948	40.4493	103.733	74.0866	29.6768	0.298661	55.7914
	40	146.122	80.5705	170.711	664.426	13.3397	435.73	85.5305	47.7123	128.695	93.5939	38.6478	1.30006	61.8532
	50	162.565	91.1052	179.44	698.073	14.1022	500.679	103.29	55.2005	147.584	114.657	45.4223	1.04713	63.927
	60	176.634	92.8553	190.467	727.132	16.7445	576.782	110.777	59.4959	156.101	140.623	51.3483	3.13412	67.0876
	70	192.061	95.2454	183.552	748.679	17.1101	647.781	122.426	59.0115	176.028	169.055	63.2135	3.61446	69.1094
Kcnk5S345A+CaN
	File name	6H02P-A	6H02Q-A	6H02R-A	6H02S-A	6H03D-A	6H03E-A	6G23I-A	6G23K-A	6G23D-A	6H02G-A
	Dish	6H02-3-1	6H02-3-2	6H02-3-3	6H02-3-4	6H03-3-1	6H03-3-2	23-3-1a	23-3-3a	6H02-2-6	6H02-3-5
	Rs	5.502	8.234	4.932	7.798	7.192	6.144	5.446	3.88	6.285	4.927
	Ccell	26.34	21.23	23.06	17.46	22.28	14.63	29.75	25.93	19.46	21.46
	Current
	-100	-9.62293e-11	-1.00498e-10	-1.43422e-10	-1.81371e-10	-1.2204e-10	-9.29003e-11	-6.68078e-11	-2.05452e-10	-4.18595e-11	-7.6312e-11
	-90	-5.74509e-11	-5.75904e-11	-9.03177e-11	-1.27758e-10	-1.64349e-10	-3.0594e-11	-5.9827e-11	-1.73982e-10	-3.55165e-11	-4.81767e-11
	-80	4.90444e-12	9.95868e-12	-1.34427e-11	-9.35847e-11	1.71539e-11	5.82877e-11	-5.69318e-11	-1.35845e-10	-2.72934e-11	-5.922e-12
	-70	9.20661e-11	1.05176e-10	7.73528e-11	-5.01395e-11	1.29034e-10	1.93202e-10	-5.04985e-11	-7.54416e-11	-1.7048e-11	4.18001e-11
	-60	2.2032e-10	2.41389e-10	1.94287e-10	-1.13895e-11	3.34308e-10	3.64866e-10	-4.6454e-11	8.31612e-12	-1.03306e-13	1.12567e-10
	-50	4.03342e-10	4.39943e-10	3.354e-10	4.48321e-11	6.11715e-10	6.33923e-10	-4.20248e-11	1.24959e-10	2.15883e-11	2.06152e-10
	-40	6.6462e-10	6.98102e-10	4.92782e-10	1.02758e-10	1.02048e-09	9.31945e-10	-3.74768e-11	2.89052e-10	4.76111e-11	3.37268e-10
	-30	1.01082e-09	1.04327e-09	6.69677e-10	1.99259e-10	1.5324e-09	1.34921e-09	-3.60744e-11	4.7953e-10	8.58858e-11	4.94783e-10
	-20	1.44871e-09	1.51909e-09	9.02782e-10	2.8836e-10	2.20852e-09	1.84397e-09	-3.04468e-11	7.64024e-10	1.30274e-10	6.77761e-10
	-10	1.96741e-09	2.18313e-09	1.12691e-09	3.7055e-10	3.03736e-09	2.49052e-09	-2.47908e-11	1.10842e-09	1.8165e-10	9.26346e-10
	0	2.64518e-09	2.83689e-09	1.38119e-09	5.67856e-10	3.91139e-09	3.18462e-09	-1.2376e-11	1.51563e-09	2.40083e-10	1.1927e-09
	10	3.53362e-09	3.63732e-09	1.63801e-09	6.6343e-10	5.08229e-09	3.88668e-09	-1.05372e-11	2.01244e-09	2.9094e-10	1.58204e-09
	20	4.36675e-09	4.54899e-09	1.9749e-09	7.81211e-10	6.40519e-09	4.78395e-09	1.02118e-11	2.64802e-09	4.33272e-10	1.87835e-09
	30	5.33518e-09	5.6947e-09	2.19661e-09	9.54083e-10	7.64199e-09	5.48383e-09	1.66632e-11	3.24447e-09	6.20217e-10	2.27939e-09
	40	6.4597e-09	6.61492e-09	2.50444e-09	1.05387e-09	9.10711e-09	6.27459e-09	2.88585e-11	3.90462e-09	6.70506e-10	2.71695e-09
	50	7.54119e-09	7.66824e-09	2.6298e-09	1.09691e-09	1.02861e-08	7.31458e-09	4.5186e-11	4.73624e-09	7.37048e-10	3.03177e-09
	60	8.74448e-09	8.15954e-09	2.98275e-09	1.28382e-09	1.13406e-08	8.01548e-09	4.22211e-11	5.36355e-09	8.7148e-10	3.36624e-09
	70	9.6102e-09	9.1013e-09	3.00405e-09	1.25701e-09	1.25978e-08	8.62253e-09	5.40031e-11	6.09694e-09	9.25467e-10	3.72011e-09
	Current
standardized	-100	-3.65335	-4.73377	-6.21951	-10.3878	-5.47756	-6.34999	-2.24564	-7.92333	-2.15105	-3.55601
to Cell Capacitance	-90	-2.18113	-2.71269	-3.91664	-7.31718	-7.37653	-2.09118	-2.01099	-6.70968	-1.8251	-2.24495
x 1000000000000	-80	0.186197	0.469085	-0.582944	-5.35995	0.769924	3.98412	-1.91367	-5.23891	-1.40254	-0.275955
	-70	3.4953	4.95412	3.35441	-2.87168	5.79147	13.2059	-1.69743	-2.90943	-0.876053	1.94781
	-60	8.36446	11.3702	8.42528	-0.65232	15.0048	24.9396	-1.56148	0.320714	-0.00530863	5.24543
	-50	15.3129	20.7227	14.5447	2.5677	27.4558	43.3303	-1.4126	4.81909	1.10937	9.60634
	-40	25.2323	32.8828	21.3696	5.88534	45.8025	63.701	-1.25972	11.1474	2.44661	15.7161
	-30	38.3759	49.1413	29.0406	11.4123	68.7792	92.2221	-1.21258	18.4933	4.41345	23.0561
	-20	55.0004	71.5539	39.1493	16.5155	99.1257	126.04	-1.02342	29.4649	6.69445	31.5825
	-10	74.6929	102.832	48.8686	21.2228	136.327	170.234	-0.833304	42.7466	9.33453	43.1662
	0	100.424	133.626	59.8955	32.5233	175.556	217.677	-0.416	58.4508	12.3373	55.5778
	10	134.154	171.329	71.0325	37.9971	228.11	265.665	-0.354192	77.6105	14.9507	73.7204
	20	165.784	214.272	85.6418	44.7429	287.486	326.996	0.343254	102.122	22.2647	87.528
	30	202.55	268.238	95.2563	54.6439	342.998	374.835	0.560108	125.124	31.8714	106.216
	40	245.243	311.584	108.605	60.3591	408.757	428.885	0.970034	150.583	34.4556	126.605
	50	286.302	361.198	114.042	62.8242	461.674	499.971	1.51886	182.655	37.875	141.275
	60	331.985	384.34	129.347	73.5292	509.004	547.88	1.4192	206.847	44.7831	156.861
	70	364.852	428.7	130.271	71.9937	565.431	589.373	1.81523	235.131	47.5574	173.351
kcnk5bS345+CaN	File name	5J30P-A	5J03F-A	5J30N-A	5J07J-A	5J03H-A	5J03I-A	5J03I-B
	Rs	9.488	10.27	11.59	13.3	4.942	9.507	8.7
	Ccell	18.44	12.32	8.956	33.88	28.78	14.7	22.49
	Current
measured	-100	-7.29628e-10	-4.24329e-11	-2.76798e-10	-2.80791e-10	-1.34091e-10	-1.01674e-10	-4.37454e-11
	-90	-5.99691e-10	-2.79055e-11	-2.17305e-10	-2.45311e-10	-1.12877e-10	-2.98425e-11	-3.81804e-11
	-80	-5.52191e-10	-5.29184e-12	-1.83135e-10	-1.86991e-10	-9.67124e-11	7.97805e-11	-3.0316e-11
	-70	-4.32174e-10	2.55062e-11	-1.46748e-10	-1.49994e-10	-7.67908e-11	2.28257e-10	-2.18911e-11
	-60	-2.84016e-10	7.36209e-11	-1.13289e-10	-1.31323e-10	-5.4443e-11	4.3251e-10	-1.26983e-11
	-50	-8.25617e-11	1.38285e-10	-8.72029e-11	-7.64195e-11	-2.64979e-11	6.67787e-10	2.08372e-12
	-40	1.54637e-10	2.28042e-10	-5.6005e-11	-2.60367e-11	4.3577e-12	9.88469e-10	2.14114e-11
	-30	3.40019e-10	3.54179e-10	-2.0353e-11	2.7018e-11	3.54301e-11	1.31877e-09	4.2342e-11
	-20	5.3326e-10	4.71165e-10	1.10764e-11	8.78967e-11	8.72152e-11	1.72154e-09	6.51476e-11
	-10	8.01578e-10	6.98765e-10	5.10783e-11	1.54205e-10	1.38346e-10	2.15758e-09	1.04972e-10
	0	9.71584e-10	8.78355e-10	8.89255e-11	2.44651e-10	2.13534e-10	2.62881e-09	1.30604e-10
	10	1.26601e-09	1.13726e-09	1.32552e-10	3.58433e-10	2.88226e-10	3.12843e-09	1.69302e-10
	20	1.4776e-09	1.42161e-09	1.62461e-10	4.80356e-10	3.83162e-10	3.61846e-09	2.17784e-10
	30	1.68817e-09	1.77294e-09	2.14956e-10	5.62317e-10	4.28375e-10	4.13951e-09	2.64129e-10
	40	1.87268e-09	2.06491e-09	2.36788e-10	6.50378e-10	5.3235e-10	4.61715e-09	3.26598e-10
	50	1.97421e-09	2.32023e-09	3.04344e-10	7.88817e-10	6.25156e-10	5.17902e-09	3.7693e-10
	60	1.89833e-09	2.50041e-09	3.92209e-10	1.31524e-09	7.00189e-10	5.65682e-09	4.06795e-10
	70	1.85578e-09	2.93329e-09	4.45654e-10	2.95597e-09	7.73625e-10	6.15413e-09	4.29875e-10
standardized	-100	-39.5677	-3.44423	-30.9064	-8.28781	-4.65917	-6.9166	-1.9451
to Cell Capacitance	-90	-32.5212	-2.26506	-24.2636	-7.24058	-3.92206	-2.0301	-1.69766
x 1000000000000	-80	-29.9453	-0.429532	-20.4483	-5.51921	-3.3604	5.42724	-1.34798
	-70	-23.4368	2.07031	-16.3854	-4.42721	-2.6682	15.5277	-0.97337
	-60	-15.4022	5.97572	-12.6495	-3.87612	-1.8917	29.4224	-0.56462
	-50	-4.47732	11.2244	-9.73681	-2.25559	-0.920705	45.4277	0.092651
	-40	8.38595	18.5099	-6.25335	-0.768498	0.151414	67.2428	0.952041
	-30	18.4392	28.7483	-2.27255	0.797462	1.23107	89.7122	1.8827
	-20	28.9187	38.2439	1.23676	2.59435	3.03041	117.112	2.89674
	-10	43.4695	56.7179	5.70325	4.55151	4.80702	146.774	4.6675
	0	52.6889	71.295	9.92915	7.2211	7.41953	178.831	5.8072
	10	68.6556	92.3101	14.8004	10.5795	10.0148	212.818	7.52788
	20	80.1302	115.39	18.1399	14.1782	13.3135	246.154	9.68359
	30	91.5493	143.907	24.0013	16.5973	14.8845	281.599	11.7443
	40	101.555	167.606	26.439	19.1965	18.4972	314.092	14.5219
	50	107.061	188.33	33.9821	23.2827	21.7219	352.314	16.7599
	60	102.946	202.955	43.7929	46.8914	24.329	384.818	18.0878
	70	100.639	238.092	49.7604	51.7804	26.8806	418.648	19.1141

## Sheet: Fig 6D
Kcnk5bS345
	File name	6H12A-A	6H12B-A	6H12C-A	6H17A-A	6H17B-A	6H17D-A	6H18E-A	6H18F-A	6H18G-A
	Dish	6H12-1-1	6H12-1-2	6H12-1-3	6H17-1-1	6H17-1-2	6H17-1-4	6H18-1-1	6H18-1-2	6H18-1-3
	Rs	5.702	5.502	6.023	3.4	6.618	6.747	7.346	5.996	5.3
	Ccell	36.81	25.11	23.05	20.6	17.74	20.01	15.61	14.59	12.6
	Current reads
	-100	-2.15134e-09	-1.32965e-10	-6.67949e-11	-4.19995e-10	1.95659e-10	1.95659e-10	-6.1005e-11	-1.57226e-10	-3.75721e-10
	-90	-4.0585e-10	-3.06302e-11	-4.41813e-11	-2.28926e-10	2.07206e-10	2.07206e-10	-4.37133e-11	-2.71952e-11	-1.11265e-10
	-80	2.08312e-09	1.10207e-10	-1.10718e-11	4.84401e-11	2.21981e-10	2.21981e-10	-2.08546e-11	1.59244e-10	1.69066e-10
	-70	5.48826e-09	3.09267e-10	2.39618e-11	4.27221e-10	2.41111e-10	2.41111e-10	1.9811e-12	4.19661e-10	4.22226e-10
	-60	9.64713e-09	5.99385e-10	8.42123e-11	9.2017e-10	2.69114e-10	2.69114e-10	3.54687e-11	7.64715e-10	6.68434e-10
	-50	1.40201e-08	9.86302e-10	1.62244e-10	1.54536e-09	3.09504e-10	3.09504e-10	8.53819e-11	1.20222e-09	9.76667e-10
	-40	1.86202e-08	1.48776e-09	2.35695e-10	2.29914e-09	3.56315e-10	3.56315e-10	1.45091e-10	1.74019e-09	1.2232e-09
	-30	2.23246e-08	2.17242e-09	3.6876e-10	3.1881e-09	4.08115e-10	4.08115e-10	2.09713e-10	2.40563e-09	1.50058e-09
	-20	2.54404e-08	2.96903e-09	4.91715e-10	4.2002e-09	4.69757e-10	4.69757e-10	2.9875e-10	3.28926e-09	1.71213e-09
	-10	2.77146e-08	3.91898e-09	6.44455e-10	5.35504e-09	5.42732e-10	5.42732e-10	4.40449e-10	4.19863e-09	2.34763e-09
	0	2.96267e-08	5.07895e-09	8.12818e-10	6.56318e-09	6.40638e-10	6.40638e-10	5.357e-10	5.34358e-09	2.76961e-09
	10	3.07648e-08	6.45014e-09	1.02385e-09	7.86168e-09	7.303e-10	7.303e-10	7.1303e-10	6.73877e-09	3.24542e-09
	20	3.17506e-08	7.76452e-09	1.13631e-09	9.16131e-09	8.04347e-10	8.04347e-10	8.46067e-10	7.69052e-09	3.66719e-09
	30	3.27294e-08	9.26428e-09	1.34429e-09	1.05494e-08	9.05108e-10	9.05108e-10	9.98204e-10	9.5182e-09	4.26504e-09
	40	3.33451e-08	1.07163e-08	1.47556e-09	1.20738e-08	9.44985e-10	9.44985e-10	1.1604e-09	1.18964e-08	5.01506e-09
	50	3.34536e-08	1.2158e-08	1.5797e-09	1.3455e-08	1.02674e-09	1.02674e-09	1.32557e-09	1.37383e-08	6.28555e-09
	60	3.40399e-08	1.32142e-08	1.62721e-09	1.44645e-08	1.05737e-09	1.05737e-09	1.46712e-09	1.51734e-08	7.07881e-09
	70	3.33689e-08	1.37987e-08	1.60164e-09	1.52764e-08	1.08674e-09	1.08674e-09	1.55305e-09	1.68989e-08	8.64623e-09
	Current
standardized	-100	-58.4444	-5.2953	-2.89783	-20.3881	11.0293	9.77806	-3.90807	-10.7763	-29.8191
to Cell Capacitance	-90	-11.0255	-1.21984	-1.91676	-11.1129	11.6802	10.3551	-2.80034	-1.86396	-8.83056
x 1000000000000	-80	56.5911	4.38897	-0.480338	2.35146	12.513	11.0935	-1.33598	10.9146	13.4179
	-70	149.097	12.3165	1.03956	20.7389	13.5914	12.0495	0.126912	28.7636	33.51
	-60	262.079	23.8704	3.65346	44.6684	15.1699	13.449	2.27218	52.4136	53.0503
	-50	380.877	39.2793	7.03879	75.0175	17.4467	15.4675	5.46969	82.4003	77.5133
	-40	505.846	59.2497	10.2254	111.609	20.0854	17.8068	9.29475	119.273	97.0794
	-30	606.482	86.5161	15.9983	154.762	23.0054	20.3956	13.4345	164.882	119.094
	-20	691.127	118.241	21.3325	203.893	26.4801	23.4761	19.1384	225.446	135.883
	-10	752.91	156.072	27.959	259.953	30.5937	27.123	28.2158	287.775	186.32
	0	804.855	202.268	35.2633	318.601	36.1126	32.0159	34.3177	366.249	219.81
	10	835.773	256.875	44.4187	381.635	41.1669	36.4968	45.6778	461.876	257.573
	20	862.554	309.22	49.2976	444.724	45.3409	40.1973	54.2003	527.109	291.047
	30	889.144	368.948	58.3206	512.107	51.0207	45.2328	63.9464	652.378	338.495
	40	905.871	426.774	64.0156	586.107	53.2686	47.2256	74.337	815.38	398.021
	50	908.818	484.19	68.5336	653.155	57.8771	51.3113	84.918	941.624	498.853
	60	924.746	526.252	70.5948	702.16	59.6037	52.8421	93.9859	1039.99	561.81
	70	906.517	549.53	69.4855	741.573	61.2593	54.3098	99.4907	1158.25	686.209
Kcnk5bS345E
	File name	6H12D-A	6H12E-A	6H12F-A	6H12G-A	6N17E-A	6H17F-A	6H17L-A	6H17M-A	6H18K-A	6H18L-A	6H18M-A
	Dish	6H12-3-1	6H12-3-2	6H12-3-3	6H12-3-4	6H17-2-1	6H17-2-2	6H17-2-4	6H17-2-5	6H18-3-1	6H18-3-2	6H18-3-3
	Rs	5.037	7	5.906	4.084	5.124	4.753	4.598	2.9	8.131	5.298	3.68
	Ccell	38.69	25.5	22.41	23.44	25.9	24.55	20.71	26.99	30.05	14.3	19.57
	Current reads
	-100	-1.78334e-10	-2.40372e-10	-8.31823e-10	-1.5608e-10	-1.39478e-10	-3.74561e-11	-5.44551e-10	-7.06281e-10	-8.34606e-11	-1.43382e-09	-6.44329e-11
	-90	-1.1593e-10	-9.95248e-11	-6.75708e-10	-4.52531e-11	-9.49613e-11	-3.31327e-11	-3.40759e-10	-3.23595e-10	-3.65972e-11	-4.87346e-10	-3.23881e-11
	-80	-4.45041e-11	9.55888e-11	-4.41012e-10	9.22056e-11	-3.9313e-11	-2.81689e-11	6.92665e-12	2.2874e-10	3.94406e-11	8.12297e-10	1.71875e-11
	-70	4.17123e-11	3.83171e-10	-2.20677e-10	3.51255e-10	5.70403e-11	-1.93363e-11	5.42815e-10	9.37102e-10	1.37654e-10	2.21911e-09	8.73997e-11
	-60	1.40261e-10	7.90201e-10	8.31818e-11	6.69401e-10	1.95116e-10	-5.24019e-12	1.30114e-09	1.82953e-09	2.91505e-10	4.05716e-09	1.92423e-10
	-50	2.928e-10	1.32645e-09	5.15697e-10	1.11493e-09	3.79796e-10	1.31689e-11	2.30565e-09	2.87755e-09	4.83044e-10	6.21103e-09	3.20995e-10
	-40	4.49822e-10	2.02805e-09	9.65656e-10	1.66232e-09	6.27345e-10	3.59943e-11	3.59441e-09	4.06901e-09	7.60868e-10	8.68008e-09	5.44958e-10
	-30	7.03148e-10	2.92296e-09	1.54372e-09	2.35598e-09	9.55733e-10	7.72211e-11	5.14625e-09	5.39742e-09	1.16366e-09	1.12016e-08	7.61941e-10
	-20	1.00583e-09	4.03896e-09	2.1827e-09	3.36303e-09	1.31929e-09	1.04819e-10	6.90746e-09	6.79024e-09	1.63543e-09	1.3801e-08	1.07145e-09
	-10	1.34239e-09	5.33873e-09	2.86743e-09	4.3807e-09	1.71316e-09	1.68169e-10	8.87112e-09	8.29186e-09	2.24213e-09	1.61144e-08	1.41008e-09
	0	1.76101e-09	6.627e-09	3.71923e-09	5.73208e-09	2.268e-09	2.39633e-10	1.10937e-08	9.75904e-09	3.01538e-09	1.82059e-08	1.898e-09
	10	2.21476e-09	8.15693e-09	4.48291e-09	7.11364e-09	2.83694e-09	3.56315e-10	1.33738e-08	1.13682e-08	3.83314e-09	2.08653e-08	2.41422e-09
	20	2.67903e-09	9.53541e-09	5.37642e-09	8.58708e-09	3.36063e-09	4.93009e-10	1.44719e-08	1.28858e-08	4.84746e-09	2.34681e-08	2.98661e-09
	30	3.10548e-09	1.09247e-08	6.23808e-09	1.01613e-08	4.07924e-09	5.63972e-10	1.55524e-08	1.40738e-08	5.78493e-09	2.53835e-08	3.63586e-09
	40	3.6623e-09	1.2175e-08	6.974e-09	1.15445e-08	4.48541e-09	7.91816e-10	1.60822e-08	1.5193e-08	6.72137e-09	2.69604e-08	4.1987e-09
	50	4.07478e-09	1.33456e-08	7.55682e-09	1.30424e-08	4.99706e-09	8.55085e-10	1.70754e-08	1.62374e-08	7.27902e-09	2.97143e-08	4.81215e-09
	60	4.65965e-09	1.38901e-08	7.87132e-09	1.37074e-08	5.21176e-09	1.01804e-09	1.80218e-08	1.72204e-08	8.27688e-09	3.13221e-08	5.18246e-09
	70	4.86322e-09	1.41211e-08	7.71357e-09	1.41915e-08	5.40549e-09	1.30427e-09	1.88947e-08	1.81844e-08	8.92688e-09	3.18418e-08	5.59473e-09
	Current
standardized	-100	-4.6093	-9.42635	-37.1184	-6.6587	-5.38525	-1.52571	-26.2941	-26.1682	-2.77739	-100.267	-3.29243
to Cell Capacitance	-90	-2.99638	-3.90293	-30.1521	-1.93059	-3.66646	-1.3496	-16.4538	-11.9894	-1.21788	-34.0801	-1.65499
x 1000000000000	-80	-1.15027	3.74858	-19.6793	3.93369	-1.51788	-1.14741	0.334459	8.47499	1.3125	56.804	0.878258
	-70	1.07812	15.0263	-9.84726	14.9853	2.20233	-0.787629	26.2103	34.7203	4.58083	155.183	4.466
	-60	3.62525	30.9883	3.71182	28.5581	7.53344	-0.21345	62.8267	67.7855	9.70067	283.717	9.83255
	-50	7.56785	52.0176	23.0119	47.5653	14.6639	0.536411	111.33	106.615	16.0747	434.338	16.4024
	-40	11.6263	79.5314	43.0904	70.9181	24.2218	1.46616	173.559	150.76	25.3201	606.999	27.8466
	-30	18.1739	114.626	68.8853	100.511	36.9009	3.14546	248.491	199.979	38.7241	783.329	38.9341
	-20	25.9972	158.391	97.3985	143.474	50.9378	4.26961	333.533	251.584	54.4236	965.105	54.7496
	-10	34.696	209.362	127.953	186.89	66.1452	6.85006	428.35	307.22	74.6133	1126.88	72.0531
	0	45.5159	259.882	165.963	244.543	87.5676	9.76102	535.669	361.58	100.345	1273.14	96.9852
	10	57.2437	319.88	200.041	303.483	109.534	14.5138	645.765	421.2	127.559	1459.11	123.363
	20	69.2435	373.938	239.912	366.343	129.754	20.0818	698.788	477.429	161.313	1641.13	152.612
	30	80.2657	428.42	278.361	433.503	157.5	22.9724	750.961	521.445	192.51	1775.07	185.787
	40	94.6575	477.451	311.2	492.513	173.182	32.2532	776.543	562.912	223.673	1885.34	214.548
	50	105.319	523.357	337.207	556.416	192.937	34.8303	824.5	601.608	242.23	2077.92	245.894
	60	120.436	544.71	351.241	584.787	201.226	41.468	870.198	638.029	275.437	2190.36	264.817
	70	125.697	553.769	344.202	605.439	208.706	53.1271	912.347	673.746	297.068	2226.7	285.883
Kcnk5bS345E+CaN
	File name	6H17H-A	6H17I-A	6H17J-A	6H17K-A	6H18H-A	6H18I-A	6H18J-A
	Dish	6H17-4-1	6H17-4-2	6H17-4-3	6H17-4-4	6H18-4-1	6H18-4-2	6H18-4-3
	Rs	3.7	5.405	6.2	6.402	4.275	5.906	7.155
	Ccell	21.2	21.39	22.51	25.3	14.44	25.71	15.97
	Current reads
	-100	-1.48267e-09	-1.7171e-10	-4.35697e-10	-1.65092e-09	-5.54996e-11	-1.27554e-10	-1.51613e-10
	-90	-1.11717e-09	9.21488e-12	-2.63611e-10	-1.19897e-09	-3.11844e-11	-3.6169e-11	-8.5951e-11
	-80	-5.67433e-10	2.36813e-10	-1.97314e-12	-5.60201e-10	7.00424e-12	9.42014e-11	-5.4321e-12
	-70	2.47663e-10	5.6532e-10	3.79029e-10	2.57683e-10	6.1466e-11	2.57049e-10	9.73688e-11
	-60	1.36645e-09	9.88807e-10	8.86922e-10	1.31861e-09	1.33254e-10	4.57797e-10	2.44871e-10
	-50	2.84604e-09	1.54825e-09	1.59231e-09	2.67336e-09	2.40492e-10	7.35625e-10	4.27907e-10
	-40	4.69163e-09	2.25397e-09	2.51365e-09	4.15439e-09	3.91684e-10	1.05906e-09	6.73328e-10
	-30	6.906e-09	3.11242e-09	3.63933e-09	5.818e-09	5.51036e-10	1.47518e-09	1.002e-09
	-20	9.35733e-09	4.11869e-09	5.01616e-09	7.84716e-09	7.50397e-10	1.91495e-09	1.40643e-09
	-10	1.19671e-08	5.27208e-09	6.49368e-09	9.63999e-09	1.05822e-09	2.46705e-09	1.9703e-09
	0	1.48894e-08	6.64892e-09	8.15802e-09	1.12886e-08	1.37965e-09	3.12649e-09	2.64601e-09
	10	1.79006e-08	8.01819e-09	9.98188e-09	1.34741e-08	1.65371e-09	3.76665e-09	3.19078e-09
	20	2.06522e-08	9.52748e-09	1.18603e-08	1.53598e-08	2.05262e-09	4.43736e-09	3.93763e-09
	30	2.32668e-08	1.13522e-08	1.34166e-08	1.68284e-08	2.45267e-09	5.28673e-09	4.76591e-09
	40	2.58963e-08	1.32874e-08	1.42946e-08	1.82587e-08	2.91342e-09	5.91653e-09	5.20128e-09
	50	2.80516e-08	1.44845e-08	1.51032e-08	1.99066e-08	3.19556e-09	6.66735e-09	5.63741e-09
	60	2.9913e-08	1.50449e-08	1.59701e-08	2.1053e-08	3.56325e-09	7.39297e-09	6.01938e-09
	70	3.17162e-08	1.55623e-08	1.67344e-08	2.20472e-08	3.92083e-09	7.94356e-09	5.94268e-09
	Current
standardized	-100	-69.9373	-8.02758	-19.3557	-65.2538	-3.84346	-4.96126	-9.49361
to Cell Capacitance	-90	-52.6967	0.430803	-11.7108	-47.3901	-2.15958	-1.40681	-5.38203
x 1000000000000	-80	-26.7657	11.0712	-0.0876562	-22.1423	0.485058	3.664	-0.340144
	-70	11.6822	26.4292	16.8382	10.1851	4.25665	9.99802	6.09698
	-60	64.4552	46.2275	39.4012	52.119	9.22812	17.8062	15.3332
	-50	134.247	72.382	70.7379	105.666	16.6546	28.6124	26.7944
	-40	221.303	105.375	111.668	164.205	27.1249	41.1925	42.1621
	-30	325.755	145.508	161.676	229.96	38.1604	57.3777	62.7426
	-20	441.383	192.552	222.841	310.164	51.9666	74.4827	88.067
	-10	564.486	246.474	288.48	381.027	73.2839	95.9568	123.375
	0	702.33	310.842	362.418	446.19	95.5436	121.606	165.686
	10	844.368	374.857	443.442	532.573	114.523	146.505	199.798
	20	974.16	445.417	526.89	607.107	142.148	172.593	246.564
	30	1097.49	530.725	596.028	665.154	169.852	205.629	298.429
	40	1221.52	621.197	635.033	721.688	201.76	230.126	325.691
	50	1323.19	677.162	670.955	786.822	221.299	259.329	353
	60	1410.99	703.361	709.467	832.134	246.762	287.552	376.918
	70	1496.05	727.55	743.421	871.431	271.526	308.968	372.115

## Sheet: Fig. 6E
Time	non-tg
pre- Amp	0.453526	0.475113	0.470825	0.5005	0.433059	0.484004	0.470758	0.484428	0.469321	0.472402	0.532	0.501977	0.472614
Amp	0.336835	0.343173	0.3602	0.371956	0.340396	0.353405	0.343862	0.374053	0.359953	0.365192	0.421003	0.390389	0.391389
5	0.398927	0.388305	0.427812	0.41016	0.366992	0.366409	0.419987	0.417706	0.430725	0.428323	0.434986	0.440469
12	0.443635	0.457727	0.472171	0.468556	0.435396	0.48688			0.450435	0.477536	0.472081	0.487419	0.460797
19	0.485053	0.478477	0.496628	0.483374	0.459912	0.452066			0.483699	0.499043	0.510388	0.458351	0.471014
26	0.478247	0.502839		0.485814	0.454431	0.490869			0.455541	0.472321	0.509845	0.48574	0.469889
33	0.486967	0.494854		0.485312	0.466563	0.497363			0.485527	0.510602	0.454787	0.461427	0.478249
	kcnk5bS345
pre- Amp	0.478643	0.533575	0.50061	0.521257	0.469072	0.529324	0.516389	0.45395	0.473872	0.456497	0.468693	0.469232	0.464955
Amp	0.375162	0.46503	0.397142	0.350899	0.369987	0.398328	0.413862	0.349417	0.382003	0.3369	0.347128	0.385732	0.33812
5	0.408999	0.473892	0.424066	0.41117	0.398689	0.455882	0.440786	0.417801	0.402406	0.433864	0.461517	0.391863	0.404855
12	0.481084	0.48053	0.472311	0.477345	0.446981	0.497483	0.507392	0.499931	0.478115	0.504733	0.431322	0.465107	0.489405
19	0.527114	0.499186	0.512171	0.534679	0.462862	0.551048	0.513526	0.534274	0.524769	0.505365	0.45586	0.536775	0.543209
26	0.533645	0.52759	0.537498	0.571678		0.52065	0.521366	0.52924	0.53684	0.554562	0.536492	0.550959	0.468645
33	0.536922	0.515782	0.553234	0.5661		0.534142	0.53832	0.556459	0.561209	0.525231	0.465727	0.553199	0.529395
	kcnk5bS345A
pre- Amp	0.459501	0.442296	0.528474	0.451923	0.499579	0.45632	0.427741	0.495674	0.486335	0.474428	0.461323	0.462302	0.516328
Amp	0.357018	0.31891	0.330942	0.356303	0.388824	0.327225	0.28078	0.390167	0.367094	0.357512	0.374888	0.354583	0.401222
5	0.401131	0.449919	0.368952	0.338427				0.392402	0.406397	0.393624	0.437308	0.400313
12	0.462922	0.481958	0.432896	0.410296				0.415406	0.445062	0.440399	0.400442	0.469635
19	0.481485	0.478197	0.489981	0.45812	0.450115	0.459001	0.465913		0.474351	0.466067	0.482019	0.45216
26	0.496066	0.504427	0.50682	0.47913	0.467984	0.46121	0.475515	0.478959	0.440676	0.485375
33	0.510914	0.520944	0.520421	0.486838	0.454486	0.470219	0.479444	0.448805	0.479418	0.497281
	kcnk5bS345E
pre- Amp	0.47651	0.501641	0.472886	0.467845	0.504313	0.494883	0.504035	0.489911	0.516751	0.479733	0.4434	0.463764
Amp	0.372317	0.377766	0.358247	0.374175	0.39548	0.402736	0.390479	0.420405	0.391994	0.396836	0.36197	0.354765
5	0.435975	0.444818	0.395273	0.437496	0.428464	0.465991	0.463814	0.438411	0.466145	0.481082	0.431799	0.433594
12	0.497409	0.528584	0.494849	0.485458	0.52892	0.549504	0.536374	0.57626	#VALUE!	0.53667	0.566276	0.416901
19	0.519888	0.553894	0.539753	0.525817	0.586676	0.569402	0.656506	0.604446	0.497051	0.559615	0.661521
26	0.581039	0.614912		0.569305	0.689915	0.630838	0.673855	0.560089	0.716574	0.64426	0.691529
33	0.604889	0.627758		0.585509	0.709218	0.658802	0.729336	0.615155	0.779087	0.710287	0.697455
